# Supplementary material for: Optimizing future well-being with artificial intelligence: self-organizing maps (SOMs) for the identification of islands of emotional stability
Source: Aging (Albany NY). 2022 Jun 20;14(12):4935–58. doi: 10.18632/aging.204061 (PMC9271294; doi:10.18632/aging.204061)
Supplement: Supplementary File 1 [file aging-14-204061-s003.xlsx]

## Sheet: Description
	Sheet	Description
1	MIDUS1 VARS	Variable names and shortened descriptions parsed from MIDUS1 study dictionary
2	Round 1	The results of the first round of Boruta feature selection. Important features to be included in model training were considered based on their association with a MIDUS2 target variable. Variables that may not be modified were excluded. Composite variables were decomposed into their respective elemental variables and introduced into Round 2. Since a MIDUS2 variable may be associated with multiple …
3	Round 2	The procedure from Round 1 was on the remaining variables. In addition, Variance Inflation Factor (VIF) threshold was applied to the variables to reduce collinearity in the final model. Only features with VIF<10 were used The remaining list of features was then curated to exclude any problematic features. Features excluded this way include those that may be considered outside of one's control (e.…
4	Round 2 — Extra	Detailed description of features from Round 2. The description includes variable IDs, short names, exact questions asked to respondents, and the description of the scales used in MIDUS.
	The same set of features remaining after Round 2 was used to train all six predictors of future well-being, as well as the age predictor.

## Sheet: MIDUS1 VARS
ix	Relevant	Composite	Description
1	M2FAMNUM		MIDUS 2 Family number
2	SAMPLMAJ		Major sample identification
3	A1STATUS		Completion status of M1 respondents
4	A1PAGE_M2	N	Respondent's calculated age at MIDUS 1 Project 1 phone interview
5	A1PRAGE_2019	N	Respondent's calculated age at MIDUS 1 Project 1 phone interview, updated
6	M1AGE_FLAG		Flag indicates status changes in M1 age
7	A1PBYEAR	N	Respondent's birth year at MIDUS 1 Project 1 phone interview
8	A1PBYEAR_2019	N	Respondent's birth year at MIDUS 1 Project 1 phone interview, updated as
9	M1BYEAR_FLAG		Flag indicates status changes in M1 birth year
10	A1PRSEX		Respondent's sex
11	QL2		Men in household age 25-74
12	QL3		Women in household age 25-74
13	HH_CELL		Household composition of M/F 25-74
14	NPRB_SEX		Probability of selection - gender
15	SEX_CELL		Number of selected gender in household
16	NPRB_WHO		Probability of selection - within gender group
17	WHO		Position within gender group
18	PROB_R		Probability of selection on age_group
19	MO		Month R selected
20	DAY		Day R selected
21	RECON		Recontact information status
22	MO_RCVD		Month self-administered questionnaire returned
23	DY_RCVD		Day self-administered questionnaire returned
24	TOT_SIBS		Total siblings including main R
25	ZYGCAT		Zygotic category
26	A1PI_MO		Interview date - Month
27	A1PI_YR		Interview date - Year
28	A1WGHT1		M1 Main random-digit-dial (RDD) phone sampling and post-stratification weight
29	A1WGHT2		M1 Main random-digit-dial (RDD) phone and self-administered questionnaire (SAQ)
30	A1PWGHT1		M1 Main random-digit-dial (RDD) phone post-stratification weight - education
31	A1PWGHT2		M1 Main random-digit-dial (RDD) phone post-stratification weight - race
32	A1PWGHT3		M1 Main random-digit-dial (RDD) phone post-stratification weight - age
33	A1PWGHT4		M1 Main random-digit-dial (RDD) phone post-stratification weight - sex
34	A1PWGHT5		M1 Main random-digit-dial (RDD) phone post-stratification weight - marital status
35	A1PWGHT6		M1 Main random-digit-dial (RDD) phone post-stratification weight - education x
36	A1PWGHT7		M1 Main random-digit-dial (RDD) phone post-stratification weight - sex x
37	A1PWGHT8		M1 Main random-digit-dial (RDD) phone post-stratification weight - race x
38	A1SWGHT1		M1 Main random-digit-dial (RDD) phone and self-administered questionnaire
39	A1SWGHT2		M1 Main random-digit-dial (RDD) phone and self-administered questionnaire
40	A1SWGHT3		M1 Main random-digit-dial (RDD) phone and self-administered questionnaire
41	A1SWGHT4		M1 Main random-digit-dial (RDD) phone and self-administered questionnaire
42	A1SWGHT5		M1 Main random-digit-dial (RDD) phone and self-administered questionnaire
43	A1SWGHT6		M1 Main random-digit-dial (RDD) phone and self-administered questionnaire
44	A1SWGHT7		M1 Main random-digit-dial (RDD) phone and self-administered questionnaire
45	A1SWGHT8		M1 Main random-digit-dial (RDD) phone and self-administered questionnaire
46	A1PA4	N	Physical health self-evaluated
47	A1PA5	N	Mental/emotional health self-evaluated
48	A1PA6	N	Health compared to others your age
49	A1PA7	N	Days unable to work because of health (30 days)
50	A1PA7A	N	Reason unable to work (physical, mental, combination)
51	A1PA7BA		Number of days unable work due to physical health only
52	A1PA7BB		Number of days unable work due to mental health only
53	A1PA7BC		Number of days unable work due to physical and mental health
54	A1PA8		Days cut back work because of health (30 days)
55	A1PA8A		Reason cut back on work (physical, mental, combination)
56	A1PA8BA		Number of days cut back due to physical health only
57	A1PA8BB		Number of days cut back due to mental health only
58	A1PA8BC		Number of days cut back due to mental and physical
59	A1PA9		Physical health at 16
60	A1PA10	N	Mental health at 16
61	A1PA11		Heart trouble suspect/confirmed by doctor
62	A1PA11A		Age doctor told you have heart problem
63	A1PA11BA		Diagnosis - Heart attack
64	A1PA11BB		Diagnosis - Angina
65	A1PA11BC		Diagnosis - High blood pressure
66	A1PA11BD		Diagnosis - Valve disease
67	A1PA11BE		Diagnosis - Hole in heart
68	A1PA11BF		Diagnosis - Blocked artery
69	A1PA11BG		Diagnosis - Irregular heartbeat
70	A1PA11BH		Diagnosis - Heart murmur
71	A1PA11BI		Diagnosis - Heart failure
72	A1PA11BJ		Diagnosis - Other
73	A1PA11BK		Diagnosis - None
74	A1PA11C		Go to hospital for heart treatment/tests
75	A1PA11D		Getting treatment for heart trouble now
76	A1PA12		Ever had heart attack
77	A1PA12A		Year had first heart attack
78	A1PA13		Heart attack risk compared to others
79	A1PA13A		Degree of higher risk for heart attack
80	A1PA13B		Degree of lower risk for heart attack
81	A1PHRTRS		Subjective heart attack risk
82	A1PHRTDX		Subjective heart attack risk (binary)
83	A1PA14		Number of biological family members had heart attacks
84	A1PA15		How much worry about your heart
85	A1PA16		Ever had major heart procedure
86	A1PA17		Anyone you know well had heart procedure
87	A1PA18		Would choose bypass or medication
88	A1PA19		How sure would choose bypass or medication
89	A1PA20		Treat heart with bypass or exercise
90	A1PA21		How sure choice of bypass or exercise
91	A1PA22		Accept or seek 2nd open heart surgery
92	A1PA22A		How sure about 2nd open heart surgery
93	A1PA23		Chest pain walk uphill/hurry
94	A1PA24		Chest pain walk ordinary pace
95	A1PA25		When get chest pain stop/slow/continue
96	A1PA26		Does chest pain go away when stand still
97	A1PA27		How soon does chest pain go away
98	A1PA28		Where get chest pain/discomfort
99	A1PANGIN		Angina Class Rating
100	A1PA29		Ever severe pain across front of chest
101	A1PA29A		Number of times severe pain front of chest
102	A1PA29B		Talk to doctor about chest pain
103	A1PA29CA		Chest pain - Heart attack
104	A1PA29CB		Chest pain - Angina
105	A1PA29CC		Chest pain - High blood pressure
106	A1PA29CD		Chest pain - Valve disease
107	A1PA29CE		Chest pain - Hole in heart
108	A1PA29CF		Chest pain - Blocked artery
109	A1PA29CG		Chest pain - Irregular heartbeat
110	A1PA29CH		Chest pain - Heart murmur
111	A1PA29CI		Chest pain - Heart failure
112	A1PA29CJ		Chest pain - Other
113	A1PA29CK		Chest pain - None
114	A1PA33		Now taking prescription medications for blood pressure
115	A1PA34		Using other treatment high blood pressure
116	A1PA30	N	Number of months since last blood pressure test
117	A1PA31		Last blood pressure (low, normal, high)
118	A1PA32S		Exact reading systolic blood pressure
119	A1PA32D		Exact reading diastolic blood pressure
120	A1PA36		Ever had cancer
121	A1PA37		Cancer risk compared to others
122	A1PA37A		Degree of higher risk for cancer
123	A1PA37B		Degree of lower risk for cancer
124	A1PCACRS		Subjective cancer risk
125	A1PCACDX		Subjective cancer risk (binary)
126	A1PA38		Cancer treatment/therapy currently
127	A1PA39A		Breast cancer ever
128	A1PA39B		Cervical cancer ever
129	A1PA39C		Colon cancer ever
130	A1PA39D		Lung cancer ever
131	A1PA39E		Lymphoma/leukemia cancer ever
132	A1PA39F		Ovarian cancer ever
133	A1PA39G		Prostate cancer ever
134	A1PA39H		Skin cancer/melanoma ever
135	A1PA39I		Uterine cancer ever
136	A1PA39J		Other cancer ever (specify)
137	A1PA41		Age had first cigarette
138	A1PA40		Ever smoked cigarettes regularly
139	A1PA42		Age began to smoke regularly
140	A1PA43		Now smoke cigarettes regularly
141	A1PA44		Cigarettes per day during heaviest year (current smoker)
142	A1PA45		Ever tried to quit smoking
143	A1PA46		Age last smoked regularly
144	A1PA47		Cigarettes per day during heaviest year (ex-smoker)
145	A1PA52	N	Age had first drink of alcohol
146	A1PA53		Time when drink 3+ days a week
147	A1PA53A		Age began drinking regularly
148	A1PA54		When drank most, had at least one (frequency)
149	A1PA54A		How many days per month (when most, if less than 1/week)
150	A1PA55	N	When drank most, number of drinks when drank
151	A1PA56		Age last drank often
152	A1PA57		Felt sad/depressed for 2 or more weeks (12 months)
153	A1PA58		Sad/depressed lasted how long (2 weeks sad)
154	A1PA59		How often felt sad/depressed (2 weeks sad)
155	A1PA60		Lose interest in most things (2 weeks sad)
156	A1PA61		Felt more tired/low energy (2 weeks sad)
157	A1PA62		Lost appetite (2 weeks sad)
158	A1PA62A		Increased appetite (2 weeks sad)
159	A1PA63		More trouble falling asleep (2 weeks sad)
160	A1PA63A		How often trouble fall sleep (2 weeks sad)
161	A1PA64		More trouble concentrating (2 weeks sad)
162	A1PA65		Felt down/no good/worthless (2 weeks sad)
163	A1PA66		Thought a lot about death (2 weeks sad)
164	A1PDEPAF		Depressed affect (continuous)
165	A1PDEPAD		Depressed affect (binary)
166	A1PA67		Number of weeks sad/depressed (12 months)
167	A1PA68MO		Most recent month sad/depressed
168	A1PA68YR		Most recent year sad/depressed
169	A1PA69	N	Time lost interest 2 or more weeks (12 months)
170	A1PA70		How long loss interest lasted (2 weeks interest)
171	A1PA71		How often felt loss interest (2 weeks interest)
172	A1PA72		Felt more tired/low energy (2 weeks interest)
173	A1PA73		Lost appetite (2 weeks interest)
174	A1PA73A		Increased appetite (2 weeks interest)
175	A1PA74		More trouble fall sleep (2 weeks interest)
176	A1PA74A		How often trouble fall sleep (2 weeks interest)
177	A1PA75		More trouble concentrating (2 weeks interest)
178	A1PA76		Felt down/no good/worthless (2 weeks interest)
179	A1PA77		Thought a lot about death (2 weeks interest)
180	A1PANHED		Anhedonia (continuous)
181	A1PANHDX		Anhedonia (binary)
182	A1PDEPRE		Depressed affect + anhedonia (continuous)
183	A1PDEPDX		Depressed affect + anhedonia (binary)
184	A1PA78		Number of weeks lost interest (12 months)
185	A1PA79MO		Most recent month lost interest
186	A1PA79YR		Most recent year lost interest
187	A1PA80		Worry more, less, about same as others
188	A1PA80A		Worry a lot, somewhat, little more
189	A1PA81		Frequency of worrying (12 months)
190	A1PA81A		How long worry lasts on days you worry
191	A1PA82		Worry about one thing or more than one
192	A1PA82A		Different worries on mind at same time
193	A1PA83		Worry about things not likely to happen
194	A1PA83A		Worry about things that are not serious
195	A1PA84		How often can't put worry out of mind
196	A1PA84A		How often difficult to control worry
197	A1PA85A		Restless because of worry (12 months)
198	A1PA85B		Keyed up/on edge/nervous energy (12 months)
199	A1PA85C		Irritable because of worry (12 months)
200	A1PA85D		Trouble falling asleep because of worry (12 months)
201	A1PA85E		Trouble staying asleep because of worry (12 months)
202	A1PA85F		Trouble concentrating because of worry (12 months)
203	A1PA85G		Trouble remembering because of worry (12 months)
204	A1PA85H		Low on energy because of worry (12 months)
205	A1PA85I		Tire easily because of worry (12 months)
206	A1PA85J		Sore/aching muscles because of worry (12 months)
207	A1PANXIE		Anxiety disorder (continuous)
208	A1PANXTD		Anxiety disorder (binary)
209	A1PA86		How much worry interferes with your life
210	A1PA87		Have spell/attack (12 months)
211	A1PA87A		Spell/attack for no reason (12 months)
212	A1PA88		Number of attacks (12 months)
213	A1PA89		Attack happen when danger or center attention
214	A1PA90A		Heart pounds during attacks
215	A1PA90B		Tight/pain in chest during attacks
216	A1PA90C		Sweat during attacks
217	A1PA90D		Tremble/shake during attacks
218	A1PA90E		Hot flashes/chills during attacks
219	A1PA90F		Things seem unreal during attacks
220	A1PPANIC		Panic attack (continuous)
221	A1PPANDX		Panic attack (binary)
222	A1PB1	N	Highest level of education completed
223	A1PMQB1		R education categories 1
224	A1PEDUCP		R education categories 2
225	A1PEDU		R education - dichotomous
226	A1PSXEDAG	N	Sex/education/age category of R
227	A1PB2		Age first worked for pay for 6 or more months
228	A1PB3A		Current employment - Working
229	A1PB3B		Current employment - Self-employed
230	A1PB3C		Current employment - Unemployed
231	A1PB3D		Current employment - Temporarily laid off
232	A1PB3E		Current employment - Retired
233	A1PB3F		Current employment - Homemaker
234	A1PB3G		Current employment - Full-time student
235	A1PB3H		Current employment - Part-time student
236	A1PB3I		Current employment - Maternity or sick leave
237	A1PB3J		Current employment - Permanently disabled
238	A1PB3K		Current employment - Other (specify)
239	A1PB5		Length of unemployment (number of weeks)
240	A1PB4A		Reason for current unemployment - Fired
241	A1PB4B		Reason for current unemployment - Laid off
242	A1PB4C		Reason for current unemployment - Plant/company closed
243	A1PB4D		Reason for current unemployment - Quit
244	A1PB4E		Reason for current unemployment - Retired
245	A1PB4F		Reason for current unemployment - Work force reduction (volunteered)
246	A1PB4G		Reason for current unemployment - Other (specify)
247	A1PB6		Working for pay at the present time
248	A1PB8_2		Supervises others (current job)
249	A1PB8_3		Number of people supervised (current job)
250	A1PB10		Employee or self-employed (current job)
251	A1POCC	N	Respondent current occupation
252	A1PIND	N	Respondent current industry
253	A1POCMJ	N	R's current occupation - major groups
254	A1PINMJ	N	R's current industry - major groups
255	A1PTSEI	N	Respondent current - Socioeconomic Index (SEI) 80 - total
256	A1PTEARN	N	Respondent current - logit all earn >= 14.30
257	A1PTEDU	N	Respondent current - logit all education some college
258	A1PFSEI	N	Respondent current - Socioeconomic Index (SEI) 80 - female
259	A1PFEARN	N	Respondent current - logit women earn >= 14.30
260	A1PFEDU	N	Respondent current - logit women education some college
261	A1PMSEI	N	Respondent current - Socioeconomic Index (SEI) 80 - male
262	A1PMEARN		Respondent current - logit men earn >= 14.30
263	A1PMEDU		Respondent current - logit men education some college
264	R_ABSCRE		Respondent current - abstract and creative
265	R_ATMOSP		Respondent current - atmospheric conditions
266	R_BOTH		Respondent current - performed in and outdoor
267	R_BUSPR		Respondent current - business contact people
268	R_CLERIC		Respondent current - clerical perception
269	R_CLIMB		Respondent current - climbing or balancing
270	R_CLRDIS		Respondent current - color discrimination
271	R_COLD	Y	Respondent current - extreme cold
272	R_COMMDA		Respondent current - communication of data
273	R_DATAL		Respondent current - complexity - relation to data
274	R_DATAPR		Respondent current - data preference
275	R_DCP		Respondent current - adapt accept responsibility
276	R_DEPL		Respondent current - adapt people instruction
277	R_ENVIRO		Respondent current - environment condition
278	R_EYHNFT		Respondent current - eye hand foot coordination
279	R_FIF		Respondent current - adapt situation feel - view
280	R_FMNHR		Respondent current - female mean hourly earn
281	R_FMNYR		Respondent current - female mean annual earn
282	R_FNGRDX		Respondent current - finger dexterity
283	R_FRMPRC		Respondent current - form perception
284	R_GED		Respondent current - general education development
285	R_HAZARD		Respondent current - hazards
286	R_HEAT		Respondent current - extreme heat
287	R_INFLU	Y	Respondent current - adapt influence ideas
288	R_INTELL		Respondent current - intelligence aptitude
289	R_MACHPR		Respondent current - activities with machines
290	R_MCHNPR	Y	Respondent current - machine preference
291	R_MEN		Respondent current - men in occupation 1979
292	R_MMNHR		Respondent current - male mean hourly earn
293	R_MMNYR		Respondent current - male mean annual earn
294	R_MNLDXT		Respondent current - manual dexterity
295	R_MTRCRD		Respondent current - motor coordination
296	R_MVC		Respondent current - adapt general measures
297	R_NOISE	Y	Respondent current - noise or vibrations
298	R_NUMERC		Respondent current - numerical aptitude
299	R_OBSPRE		Respondent current - activities with objects
300	R_OUT	Y	Respondent current - performed outdoors
301	R_PEOPLE		Respondent current - complexity with people
302	R_PEOPRE		Respondent current - work for presumed good
303	R_PHYSDM		Respondent current - physical demands
304	R_PRODPR		Respondent current - productive preference
305	R_PROTPR	Y	Respondent current - tangible productive satisfaction
306	R_PRSTPR		Respondent current - prestige of others
307	R_PUS		Respondent current - adapt perform stress
308	R_REACH		Respondent current - reaching handling feel
309	R_REPCON	Y	Respondent current - adapt repetitive work
310	R_ROUTPR	Y	Respondent current - routine activities
311	R_SCINPR		Respondent current - scientific activities
312	R_SEE		Respondent current - seeing
313	R_SJC		Respondent current - adapt general judgmental
314	R_SPATIA		Respondent current - spatial aptitude
315	R_STOOP		Respondent current - stoop kneel and crawl
316	R_STRGTH		Respondent current - strength
317	R_STS		Respondent current - adapt to situation limits
318	R_SVP	Y	Respondent current - specific vocation prep
319	R_TALK		Respondent current - talking or hearing
320	R_THINGS		Respondent current - complexity of things
321	R_TRAIN		Respondent current - training times
322	R_VARCH		Respondent current - adapt multiple duties
323	R_VERBAL		Respondent current - verbal aptitude
324	R_WET		Respondent current - wet and humid condition
325	R_WOMEN		Respondent current - women in occupation 1979
326	MINDUS_R		Respondent current - 1 if missing industry code
327	PROFID_R		Respondent current - professional / related services
328	AGRIC_R		Respondent current - agriculture, forestry, fishery, mining
329	CONSTR_R		Respondent current - construction
330	MANUF_R		Respondent current - manufacturing
331	TRANSP_R		Respondent current - transportation, communication, public utility
332	WHOLE_R		Respondent current - wholesale trade
333	RETAIL_R		Respondent current - retail trade
334	FNANCE_R		Respondent current - finance, insurance, real estate
335	BUSIN_R		Respondent current - business and repair services
336	PERSON_R		Respondent current - personal services
337	ENTERT_R		Respondent current - entertainment, recreation services
338	PUBADM_R		Respondent current - public administration
339	MOCCUP_R		Respondent current - 1 if missing occupation code
340	EXEC_R		Respondent current - executive, administrative, managerial
341	PROFOC_R		Respondent current - professional specialty
342	TECH_R		Respondent current - technicians / related support
343	SALES_R		Respondent current - sales occupations
344	ADMIN_R		Respondent current - administrative support, including clerical
345	SERV_R		Respondent current - service occupations
346	FARM_R		Respondent current - farming, forestry, fishing
347	CRAFT_R		Respondent current - precision production, craft, repair
348	OPERAT_R		Respondent current - operator, laborer, military
349	A1PB11	N	Hours work for pay at main job
350	A1PB11A	N	Hours work at other jobs
351	A1PB12	N	Number of nights away due to job (12 months)
352	A1PB14_2		Supervise others (last job)
353	A1PB14_3		Number of people supervised (last job)
354	A1PB16		Employee or self-employed (last job)
355	A1POCCP		Respondent last occupation
356	A1PINDP		Respondent last industry
357	A1POCPMJ		R's previous occupation - major groups
358	A1PINPMJ		R's previous industry - major groups
359	A1PTSEIP		Respondent last - Socioeconomic Index (SEI) 80 - total
360	A1PTEARP		Respondent last - logit all earn >= 14.30
361	A1PTEDUP		Respondent last - logit all education some college
362	A1PFSEIP		Respondent last - Socioeconomic Index (SEI) 80 - female
363	A1PFEARP		Respondent last - logit women earn >= 14.30
364	A1PFEDUP		Respondent last - logit women educ some col
365	A1PMSEIP		Respondent last - Socioeconomic Index (SEI) 80 - male
366	A1PMEARP		Respondent last - logit men earn >= 14.30
367	A1PMEDUP		Respondent last - logit men education some college
368	L_ABSCRE		Respondent last - abstract and creative
369	L_ATMOSP		Respondent last - atmospheric conditions
370	L_BOTH		Respondent last - performed in and outdoor
371	L_BUSPR		Respondent last - business contact people
372	L_CLERIC		Respondent last - clerical perception
373	L_CLIMB		Respondent last - climbing or balancing
374	L_CLRDIS		Respondent last - color discrimination
375	L_COLD		Respondent last - extreme cold
376	L_COMMDA		Respondent last - communication of data
377	L_DATAL		Respondent last - complexity - relation to data
378	L_DATAPR		Respondent last - data preference
379	L_DCP		Respondent last - adapt accept responsibility
380	L_DEPL		Respondent last - adapt people instruction
381	L_ENVIRO		Respondent last - environment condition
382	L_EYHNFT		Respondent last - eye hand foot coordination
383	L_FIF		Respondent last - adapt situation feel - view
384	L_FMNHR		Respondent last - female mean hourly earn
385	L_FMNYR		Respondent last - female mean annual earn
386	L_FNGRDX		Respondent last - finger dexterity
387	L_FRMPRC		Respondent last - form perception
388	L_GED		Respondent last - general educational development
389	L_HAZARD		Respondent last - hazards
390	L_HEAT		Respondent last - extreme heat
391	L_INFLU		Respondent last - adapt influence ideas
392	L_INTELL		Respondent last - intelligence aptitude
393	L_MACHPR		Respondent last - activities with machines
394	L_MCHNPR		Respondent last - machine preference
395	L_MEN		Respondent last - men in occupation 1979
396	L_MMNHR		Respondent last - male mean hourly earn
397	L_MMNYR		Respondent last - male mean annual earn
398	L_MNLDXT		Respondent last - manual dexterity
399	L_MTRCRD		Respondent last - motor coordination
400	L_MVC		Respondent last - adapt general measures
401	L_NOISE		Respondent last - noise or vibrations
402	L_NUMERC		Respondent last - numerical aptitude
403	L_OBSPRE		Respondent last - activities with objects
404	L_OUT		Respondent last - performed outdoors
405	L_PEOPLE		Respondent last - complexity with people
406	L_PEOPRE		Respondent last - work for presumed good
407	L_PHYSDM		Respondent last - physical demands
408	L_PRODPR		Respondent last - productive preference
409	L_PROTPR		Respondent last - tangible productive satisfaction
410	L_PRSTPR		Respondent last - prestige of others
411	L_PUS		Respondent last - adapt perform stress
412	L_REACH		Respondent last - reaching handling feel
413	L_REPCON		Respondent last - adapt repetitive work
414	L_ROUTPR		Respondent last - routine activities
415	L_SCINPR		Respondent last - scientific activities
416	L_SEE		Respondent last - seeing
417	L_SJC		Respondent last - adapt general judgmental
418	L_SPATIA		Respondent last - spatial aptitude
419	L_STOOP		Respondent last - stoop kneel and crawl
420	L_STRGTH		Respondent last - strength
421	L_STS		Respondent last - adapt to situation limits
422	L_SVP		Respondent last - specific vocation prep
423	L_TALK		Respondent last - talking or hearing
424	L_THINGS		Respondent last - complexity of things
425	L_TRAIN		Respondent last - training times
426	L_VARCH		Respondent last - adapt multiple duties
427	L_VERBAL		Respondent last - verbal aptitude
428	L_WET		Respondent last - wet and humid condition
429	L_WOMEN		Respondent last - women in occupation 1979
430	MINDUS_L		Respondent last - 1 if missing industry code
431	PROFID_L		Respondent last - professional / related services
432	AGRIC_L		Respondent last - agriculture, forestry, fishery, mining
433	CONSTR_L		Respondent last - construction
434	MANUF_L		Respondent last - manufacturing
435	TRANSP_L		Respondent last - transportation, communication, public utility
436	WHOLE_L		Respondent last - wholesale trade
437	RETAIL_L		Respondent last - retail trade
438	FNANCE_L		Respondent last - finance, insurance, real estate
439	BUSIN_L		Respondent last - business and repair services
440	PERSON_L		Respondent last - personal services
441	ENTERT_L		Respondent last - entertainment, recreation services
442	PUBADM_L		Respondent last - public administration
443	MOCCUP_L		Respondent last - 1 if missing occupation code
444	EXEC_L		Respondent last - executive, administrative, managerial
445	PROFOC_L		Respondent last - professional specialty
446	TECH_L		Respondent last - technicians / related support
447	SALES_L		Respondent last - sales occupations
448	ADMIN_L		Respondent last - administrative support, including clerical
449	SERV_L		Respondent last - service occupations
450	FARM_L		Respondent last - farming, forestry, fishing
451	CRAFT_L		Respondent last - precision production, craft, repair
452	OPERAT_L		Respondent last - operator, laborer, military
453	A1PB17		Marital status currently
454	A1PB19	N	Number of times married altogether
455	A1PB18MO	N	Month married (first marriage)
456	A1PB18YR	N	Year married (first marriage)
457	A1PB20	N	End in widow or divorce (first marriage)
458	A1PB20AMO	N	Month spouse died (first marriage)
459	A1PB20AYR	N	Year spouse died (first marriage)
460	A1PB20BMO	N	Month last live with spouse (first marriage)
461	A1PB20BYR	N	Year last live with spouse (first marriage)
462	A1PB21MO	N	Month married (recent marriage)
463	A1PB21YR	N	Year married (recent marriage)
464	A1PB22MO	N	Month last live with spouse (recent marriage)
465	A1PB22YR	N	Year last live with spouse (recent marriage)
466	A1PB23MO	N	Month spouse died (recent marriage)
467	A1PB23YR	N	Year spouse died (recent marriage)
468	A1PB24	N	Cohabitation with partner currently
469	A1PB25	N	Length of cohabitation - number of weeks
470	A1PPARTN	N	Married or cohabitating
471	A1PB26	N	Year spouse/partner born
472	A1PSAGE	N	Age of spouse/partner
473	A1PB27		Spouse/partner highest level of education completed
474	A1PMQB27		Spouse/partner education categories
475	A1PSEDU		Spouse/partner education - dichotomous
476	A1PSSXEDAG	Y	Spouse/partner sex/education/age category
477	A1PB28A		Spouse/partner current employment - Working
478	A1PB28B		Spouse/partner current employment - Self-employed
479	A1PB28C		Spouse/partner current employment - Unemployed
480	A1PB28D		Spouse/partner current employment - Temporarily laid off
481	A1PB28E		Spouse/partner current employment - Retired
482	A1PB28F		Spouse/partner current employment - Homemaker
483	A1PB28G		Spouse/partner current employment - Full-time student
484	A1PB28H		Spouse/partner current employment - Part-time student
485	A1PB28I		Spouse/partner current employment - Maternity or sick leave
486	A1PB28J		Spouse/partner current employment - Permanently disabled
487	A1PB28K	N	Spouse/partner current employment - Other (specify)
488	A1PB30		Spouse/partner length of unemployment (number of weeks)
489	A1PB29A		Spouse/partner reason for current unemployment - Fired
490	A1PB29B		Spouse/partner reason for current unemployment - Laid off
491	A1PB29C		Spouse/partner reason for current unemployment - Plant/company closed
492	A1PB29D		Spouse/partner reason for current unemployment - Quit
493	A1PB29E		Spouse/partner reason for current unemployment - Retired
494	A1PB29F		Spouse/partner reason for current unemployment - Work force reduction
495	A1PB29G		Spouse/partner reason for current unemployment - Other (specify)
496	A1PB31		Spouse/partner currently working for pay
497	A1PB33_2		Spouse/partner supervises others on main job
498	A1PB34_2		Spouse/partner employee or self-employed
499	A1POCCS	N	Spouse/Partner occupation
500	A1PINDS	N	Spouse/Partner industry
501	A1POCSMJ	N	Spousal occupation - major groups
502	A1PINSMJ	N	Spousal industry - major groups
503	A1PTSEIS	N	Spouse/partner - Socioeconomic Index (SEI) 80 - total
504	A1PTEARS	N	Spouse/partner - logit all earn >= 14.30
505	A1PTEDUS	N	Spouse/partner - logit all education some college
506	A1PFSEIS	N	Spouse/partner - Socioeconomic Index (SEI) 80 - female
507	A1PFEARS	N	Spouse/partner - logit women earn >= 14.30
508	A1PFEDUS	N	Spouse/partner - logit women education some college
509	A1PMSEIS	N	Spouse/partner - Socioeconomic Index (SEI) 80 - male
510	A1PMEARS	N	Spouse/partner - logit men earn >= 14.30
511	A1PMEDUS	N	Spouse/partner - logit men education some college
512	S_ABSCRE	N	Spouse/partner - abstract and creative
513	S_ATMOSP	N	Spouse/partner - atmospheric conditions
514	S_BOTH		Spouse/partner - performed in and outdoor
515	S_BUSPR		Spouse/partner - business contact people
516	S_CLERIC		Spouse/partner - clerical perception
517	S_CLIMB		Spouse/partner - climbing or balancing
518	S_CLRDIS		Spouse/partner - color discrimination
519	S_COLD		Spouse/partner - extreme cold
520	S_COMMDA		Spouse/partner - communication of data
521	S_DATAL		Spouse/partner - complexity - relation to data
522	S_DATAPR	Y	Spouse/partner - data preference
523	S_DCP		Spouse/partner - adapt accept responsibility
524	S_DEPL	Y	Spouse/partner - adapt people instruction
525	S_ENVIRO		Spouse/partner - environment condition
526	S_EYHNFT		Spouse/partner - eye hand foot coordination
527	S_FIF		Spouse/partner - adapt situation feel - view
528	S_FMNHR		Spouse/partner - female mean hourly earn
529	S_FMNYR		Spouse/partner - female mean annual earn
530	S_FNGRDX	Y	Spouse/partner - finger dexterity
531	S_FRMPRC		Spouse/partner - form perception
532	S_GED		Spouse/partner - general educational development
533	S_HAZARD		Spouse/partner - hazards
534	S_HEAT		Spouse/partner - extreme heat
535	S_INFLU		Spouse/partner - adapt influence ideas
536	S_INTELL		Spouse/partner - intelligence aptitude
537	S_MACHPR		Spouse/partner - activities with machines
538	S_MCHNPR		Spouse/partner - machine preference
539	S_MEN		Spouse/partner - men in occupation 1979
540	S_MMNHR		Spouse/partner - male mean hourly earn
541	S_MMNYR		Spouse/partner - male mean annual earn
542	S_MNLDXT	N	Spouse/partner - manual dexterity
543	S_MTRCRD	N	Spouse/partner - motor coordination
544	S_MVC		Spouse/partner - adapt general measures
545	S_NOISE		Spouse/partner - noise or vibrations
546	S_NUMERC		Spouse/partner - numerical aptitude
547	S_OBSPRE		Spouse/partner - activities with objects
548	S_OUT		Spouse/partner - performed outdoors
549	S_PEOPLE		Spouse/partner - complexity with people
550	S_PEOPRE	N	Spouse/partner - work for presumed good
551	S_PHYSDM		Spouse/partner - physical demands
552	S_PRODPR		Spouse/partner - productive preference
553	S_PROTPR		Spouse/partner - tangible productive satisfaction
554	S_PRSTPR	Y	Spouse/partner - prestige of others
555	S_PUS		Spouse/partner - adapt perform stress
556	S_REACH		Spouse/partner - reaching handling feel
557	S_REPCON		Spouse/partner - adapt repetitive work
558	S_ROUTPR		Spouse/partner - routine activities
559	S_SCINPR		Spouse/partner - scientific activities
560	S_SEE		Spouse/partner - seeing
561	S_SJC		Spouse/partner - adapt general judgmental
562	S_SPATIA		Spouse/partner - spatial aptitude
563	S_STOOP		Spouse/partner - stoop kneel and crawl
564	S_STRGTH		Spouse/partner - strength
565	S_STS		Spouse/partner - adapt to situation limits
566	S_SVP		Spouse/partner - specific vocation prep
567	S_TALK		Spouse/partner - talking or hearing
568	S_THINGS		Spouse/partner - complexity of things
569	S_TRAIN		Spouse/partner - training times
570	S_VARCH		Spouse/partner - adapt multiple duties
571	S_VERBAL		Spouse/partner - verbal aptitude
572	S_WET		Spouse/partner - wet and humid condition
573	S_WOMEN		Spouse/partner - women in occupation 1979
574	MINDUS_S		Spouse/partner - 1 if missing industry code
575	PROFID_S		Spouse/partner - professional / related services
576	AGRIC_S		Spouse/partner - agriculture, forestry, fishery, mining
577	CONSTR_S		Spouse/partner - construction
578	MANUF_S		Spouse/partner - manufacturing
579	TRANSP_S		Spouse/partner - transportation, communication, public utility
580	WHOLE_S		Spouse/partner - wholesale trade
581	RETAIL_S		Spouse/partner - retail trade
582	FNANCE_S		Spouse/partner - finance, insurance, real estate
583	BUSIN_S		Spouse/partner - business and repair services
584	PERSON_S		Spouse/partner - personal services
585	ENTERT_S		Spouse/partner - entertainment, recreation services
586	PUBADM_S		Spouse/partner - public administration
587	MOCCUP_S		Spouse/partner - 1 if missing occupation code
588	EXEC_S		Spouse/partner - executive, administrative, managerial
589	PROFOC_S		Spouse/partner - professional specialty
590	TECH_S		Spouse/partner - technicians / related support
591	SALES_S		Spouse/partner - sales occupations
592	ADMIN_S		Spouse/partner - administrative support, including clerical
593	SERV_S		Spouse/partner - service occupations
594	FARM_S		Spouse/partner - farming, forestry, fishing
595	CRAFT_S		Spouse/partner - precision production, craft, repair
596	OPERAT_S		Spouse/partner - operator, laborer, military
597	A1PB35		Number of biological children
598	A1PB36A1	N	Gender child 1
599	A1PB36B1	N	Year child 1 born
600	A1PB36A2	N	Gender child 2
601	A1PB36B2	N	Year child 2 born
602	A1PB36A3	N	Gender child 3
603	A1PB36B3	N	Year child 3 born
604	A1PB36A4	N	Gender child 4
605	A1PB36B4	N	Year child 4 born
606	A1PB36A5	N	Gender child 5
607	A1PB36B5	N	Year child 5 born
608	A1PB36A6	N	Gender child 6
609	A1PB36B6	N	Year child 6 born
610	A1PB36A7	N	Gender child 7
611	A1PB36B7	N	Year child 7 born
612	A1PB36A8	N	Gender child 8
613	A1PB36B8	N	Year child 8 born
614	A1PB36A9	N	Gender child 9
615	A1PB36B9	N	Year child 9 born
616	A1PB36A10	N	Gender child 10
617	A1PB36B10	N	Year child 10 born
618	A1PBAG1	N	Age of biological child 1
619	A1PBAG2	N	Age of biological child 2
620	A1PBAG3	N	Age of biological child 3
621	A1PBAG4	N	Age of biological child 4
622	A1PBAG5	N	Age of biological child 5
623	A1PBAG6	N	Age of biological child 6
624	A1PBAG7	N	Age of biological child 7
625	A1PBAG8	N	Age of biological child 8
626	A1PBAG9	N	Age of biological child 9
627	A1PBAG10	N	Age of biological child 10
628	A1PB37		Number of non-biological children
629	A1PB37A1		Gender non-biological child 1
630	A1PB37B1		Relation to non-biological child 1
631	A1PB37C1		Year non-biological child 1 born
632	A1PB37A2		Gender non-biological child 2
633	A1PB37B2		Relation to non-biological child 2
634	A1PB37C2		Year non-biological child 2 born
635	A1PB37A3		Gender non-biological child 3
636	A1PB37B3		Relation to non-biological child 3
637	A1PB37C3		Year non-biological child 3 born
638	A1PB37A4		Gender non-biological child 4
639	A1PB37B4		Relation to non-biological child 4
640	A1PB37C4		Year non-biological child 4 born
641	A1PB37A5		Gender non-biological child 5
642	A1PB37B5		Relation to non-biological child 5
643	A1PB37C5		Year non-biological child 5 born
644	A1PB37A6		Gender non-biological child 6
645	A1PB37B6		Relation to non-biological child 6
646	A1PB37C6		Year non-biological child 6 born
647	A1PB37A7		Gender non-biological child 7
648	A1PB37B7		Relation to non-biological child 7
649	A1PB37C7		Year non-biological child 7 born
650	A1PB37A8		Gender non-biological child 8
651	A1PB37B8		Relation to non-biological child 8
652	A1PB37C8		Year non-biological child 8 born
653	A1PB37A9		Gender non-biological child 9
654	A1PB37B9		Relation to non-biological child 9
655	A1PB37C9		Year non-biological child 9 born
656	A1PB37A10		Gender non-biological child 10
657	A1PB37B10		Relation to non-biological child 10
658	A1PB37C10		Year non-biological child 10 born
659	A1PBAO1		Age of non-biological child 1
660	A1PBAO2		Age of non-biological child 2
661	A1PBAO3		Age of non-biological child 3
662	A1PBAO4		Age of non-biological child 4
663	A1PBAO5		Age of non-biological child 5
664	A1PBAO6		Age of non-biological child 6
665	A1PBAO7		Age of non-biological child 7
666	A1PBAO8		Age of non-biological child 8
667	A1PBAO9		Age of non-biological child 9
668	A1PBAO10		Age of non-biological child 10
669	A1PCHILD0		Number of children under age 1
670	A1PCHILD1		Number of children aged 1
671	A1PCHILD2		Number of children aged 2
672	A1PCHILD3		Number of children aged 3
673	A1PCHILD4		Number of children aged 4
674	A1PCHILD5		Number of children aged 5
675	A1PCHILD6		Number of children aged 6
676	A1PCHILD7		Number of children aged 7
677	A1PCHILD8		Number of children aged 8
678	A1PCHILD9		Number of children aged 9
679	A1PCHILD10		Number of children aged 10
680	A1PCHILD11		Number of children aged 11
681	A1PCHILD12		Number of children aged 12
682	A1PCHILD13		Number of children aged 13
683	A1PCHILD14		Number of children aged 14
684	A1PCHILD15		Number of children aged 15
685	A1PCHILD16		Number of children aged 16
686	A1PCHILD17		Number of children aged 17
687	A1PCHILD18		Number of children aged 18
688	A1PC06		Any children aged 0-6
689	A1PC713		Any children aged 7-13
690	A1PC1417		Any children aged 14-17
691	A1PC18		Any children under 18
692	A1PE1		Lived in institution ever over the past 5 years
693	A1PE1A		Number of days lived in institution over the past 5 years
694	A1PE2		Homeless since past interview
695	A1PE2A		Number of days homeless over the past 5 years
696	A1PE3		No telephone over the past 5 years
697	A1PE3A		Number of days without telephone over the past 5 years
698	A1PC1		Live with biological parents
699	A1PCA1		Reason not live with biological parent in childhood
700	A1PCA2		Reason not live with biological parent in childhood
701	A1PCA3		Reason not live with biological parent in childhood
702	A1PCA4		Reason not live with biological parent in childhood
703	A1PCA5		Reason not live with biological parent in childhood
704	A1PCA6		Reason not live with biological parent in childhood
705	A1PCA7		Reason not live with biological parent in childhood
706	A1PCB1		Age when mother died
707	A1PCB2		Age when father died
708	A1PCB3		Age parents separated or divorced
709	A1PCB6		Age when adopted
710	A1PCB7		Age when (other) occurred
711	A1PCC		Male head of household (C1.3)
712	A1PC2	N	Father/Male head of household - Highest education level
713	A1PC3	N	Father/Male head of household - Work for pay
714	A1PC3A1	N	Father/Male head of household - Physical disability or injury
715	A1PC3A2	N	Father/Male head of household - Alcohol or drug abuse
716	A1PC3A3	N	Father/Male head of household - Mental or emotional disability
717	A1PC3A4	N	Father/Male head of household - Stayed home to raise children
718	A1PC3A5	N	Father/Male head of household - Other reason not working for pay
719	A1PC5_2	N	Father/Male head of household - Supervise anyone
720	A1PC6_2	N	Father/Male head of household - Employee or self-employed
721	A1POCCD	N	Father/Male head of household - occupation
722	A1PINDD	N	Father/Male head of household - industry
723	A1POCDMJ	N	Father/Male head of household - occupation major group (1980 Census)
724	A1PINDMJ	N	Father/Male head of household - industry major group (1980 Census)
725	A1PTSEID	N	Father/male head of household - Socioeconomic Index (SEI) 80 - total
726	A1PTEARD	N	Father/Male head of household - logit all earn >= 14.30
727	A1PTEDUD	N	Father/male head of household - logit all education some college
728	A1PFSEID	N	Father/male head of household - Socioeconomic Index (SEI) 80 - female
729	A1PFEARD	N	Father/male head of household - logit women earn >= 14.30
730	A1PFEDUD	N	Father/male head of household - logit women education some college
731	A1PMSEID	N	Father/male head of household - Socioeconomic Index (SEI) 80 - male
732	A1PMEARD	N	Father/Male head of household - logit men earn >= 14.30
733	A1PMEDUD	N	Father/male head of household - logit men education some college
734	D_ABSCRE	N	Father/Male head of household - abstract and creative
735	D_ATMOSP	N	Father/Male head of household - atmospheric conditions
736	D_BOTH	N	Father/male head of household - performed in and outdoor
737	D_BUSPR	N	Father/male head of household - business contact people
738	D_CLERIC	N	Father/Male head of household - clerical perception
739	D_CLIMB		Father/Male head of household - climbing or balancing
740	D_CLRDIS		Father/Male head of household - color discrimination
741	D_COLD		Father/Male head of household - extreme cold
742	D_COMMDA		Father/Male head of household - communication of data
743	D_DATAL		Father/male head of household - complexity - relation to data
744	D_DATAPR		Father/Male head of household - data preference
745	D_DCP		Father/male head of household - adapt accept responsibility
746	D_DEPL		Father/male head of household - adapt people instruction
747	D_ENVIRO		Father/Male head of household - environment condition
748	D_EYHNFT		Father/male head of household - eye hand foot coordination
749	D_FIF		Father/male head of household - adapt situation feel - view
750	D_FMNHR		Father/male head of household - female mean hourly earn
751	D_FMNYR		Father/male head of household - female mean annual earn
752	D_FNGRDX		Father/Male head of household - finger dexterity
753	D_FRMPRC	Y	Father/Male head of household - form perception
754	D_GED		Father/male head of household - general educational development
755	D_HAZARD		Father/Male head of household - hazards
756	D_HEAT		Father/Male head of household - extreme heat
757	D_INFLU		Father/Male head of household - adapt influence ideas
758	D_INTELL		Father/Male head of household - intelligence aptitude
759	D_MACHPR		Father/male head of household - activities with machines
760	D_MCHNPR		Father/Male head of household - machine preference
761	D_MEN		Father/Male head of household - men in occupation 1979
762	D_MMNHR		Father/male head of household - male mean hourly earn
763	D_MMNYR		Father/male head of household - male mean annual earn
764	D_MNLDXT		Father/Male head of household - manual dexterity
765	D_MTRCRD		Father/Male head of household - motor coordination
766	D_MVC		Father/Male head of household - adapt general measures
767	D_NOISE		Father/Male head of household - noise or vibrations
768	D_NUMERC		Father/Male head of household - numerical aptitude
769	D_OBSPRE		Father/male head of household - activities with objects
770	D_OUT		Father/Male head of household - performed outdoors
771	D_PEOPLE		Father/male head of household - complexity with people
772	D_PEOPRE		Father/Male head of household - work for presumed good
773	D_PHYSDM		Father/Male head of household - physical demands
774	D_PRODPR		Father/Male head of household - productive preference
775	D_PROTPR		Father/male head of household - tangible productive satisfaction
776	D_PRSTPR		Father/Male head of household - prestige of others
777	D_PUS		Father/Male head of household - adapt perform stress
778	D_REACH		Father/Male head of household - reaching handling feel
779	D_REPCON		Father/Male head of household - adapt repetitive work
780	D_ROUTPR		Father/Male head of household - routine activities
781	D_SCINPR		Father/Male head of household - scientific activities
782	D_SEE		Father/Male head of household - seeing
783	D_SJC		Father/male head of household - adapt general judgmental
784	D_SPATIA		Father/Male head of household - spatial aptitude
785	D_STOOP		Father/Male head of household - stoop kneel and crawl
786	D_STRGTH		Father/Male head of household - strength
787	D_STS		Father/male head of household - adapt to situation limits
788	D_SVP		Father/Male head of household - specific vocation prep
789	D_TALK		Father/Male head of household - talking or hearing
790	D_THINGS		Father/Male head of household - complexity of things
791	D_TRAIN		Father/Male head of household - training times
792	D_VARCH		Father/Male head of household - adapt multiple duties
793	D_VERBAL		Father/Male head of household - verbal aptitude
794	D_WET		Father/male head of household - wet and humid condition
795	D_WOMEN		Father/male head of household - women in occupation 1979
796	MINDUS_D		Father/Male head of household - 1 if missing industry code
797	PROFID_D		Father/male head of household - professional/related services
798	AGRIC_D		Father/male head of household - agriculture, forestry, fishery, mining
799	CONSTR_D		Father/Male head of household - construction
800	MANUF_D		Father/Male head of household - manufacturing
801	TRANSP_D		Father/male head of household - transportation, communication, public utility
802	WHOLE_D		Father/Male head of household - wholesale trade
803	RETAIL_D		Father/Male head of household - retail trade
804	FNANCE_D		Father/male head of household - finance, insurance, real estate
805	BUSIN_D		Father/Male head of household - business and repair services
806	PERSON_D		Father/Male head of household - personal services
807	ENTERT_D		Father/male head of household - entertainment, recreation services
808	PUBADM_D		Father/Male head of household - public administration
809	MOCCUP_D		Father/Male head of household - 1 if missing occupation code
810	EXEC_D		Father/male head of household - executive, administrative, managerial
811	PROFOC_D		Father/Male head of household - professional specialty
812	TECH_D		Father/Male head of household - technicians/related support
813	SALES_D		Father/Male head of household - sales occupations
814	ADMIN_D		Father/male head of household - administrative support, including clerical
815	SERV_D		Father/Male head of household - service occupations
816	FARM_D		Father/Male head of household - farming, forestry, fishing
817	CRAFT_D		Father/male head of household - precision production, craft, repair
818	OPERAT_D		Father/Male head of household - operator, laborer, military
819	A1PC7		Female head of household
820	A1PC8	N	Mother/Female head of household - Highest education level
821	A1PC9	N	Mother/Female head of household - Work for pay
822	A1PC9A1	N	Mother/Female head of household - Physical disability or injury
823	A1PC9A2	N	Mother/Female head of household - Alcohol or drug abuse
824	A1PC9A3	N	Mother/Female head of household - Mental or emotional disability
825	A1PC9A4	N	Mother/Female head of household - Stayed home to raise children
826	A1PC9A5	N	Mother/Female head of household - Other reason not working for pay
827	A1PC11_2	N	Mother/Female head of household - Supervise anyone
828	A1PC13_2	N	Mother/Female head of household - Employee or self-employed
829	A1POCCM	N	Mother/Female head of household - occupation
830	A1PINDM	N	Mother/Female head of household - industry
831	A1POCMMJ	N	Mother/Female head of household - occupation major group (1980 Census)
832	A1PINMMJ		Mother/Female head of household - industry major group (1980 Census)
833	A1PTSEIM	N	Mother/female head of household - Socioeconomic Index (SEI) 80 - total
834	A1PTEARM		Mother/Female head of household - logit all earn >= 14.30
835	A1PTEDUM		Mother/female head of household - logit all education some college
836	A1PFSEIM		Mother/female head of household - Socioeconomic Index (SEI) 80 - female
837	A1PFEARM		Mother/female head of household - logit women earn >= 14.30
838	A1PFEDUM		Mother/female head of household - logit women education some college
839	A1PMSEIM		Mother/female head of household - Socioeconomic Index (SEI) 80 - male
840	A1PMEARM		Mother/Female head of household - logit men earn >= 14.30
841	A1PMEDUM		Mother/female head of household - logit men education some college
842	M_ABSCRE		Mother/Female head of household - abstract and creative
843	M_ATMOSP		Mother/Female head of household - atmospheric conditions
844	M_BOTH		Mother/female head of household - performed in and outdoor
845	M_BUSPR		Mother/female head of household - business contact people
846	M_CLERIC		Mother/Female head of household - clerical perception
847	M_CLIMB		Mother/Female head of household - climbing or balancing
848	M_CLRDIS		Mother/Female head of household - color discrimination
849	M_COLD		Mother/Female head of household - extreme cold
850	M_COMMDA		Mother/Female head of household - communication of data
851	M_DATAL		Mother/female head of household - complexity - relation to data
852	M_DATAPR		Mother/Female head of household - data preference
853	M_DCP		Mother/female head of household - adapt accept responsibility
854	M_DEPL		Mother/female head of household - adapt people instruction
855	M_ENVIRO		Mother/Female head of household - environment condition
856	M_EYHNFT		Mother/female head of household - eye hand foot coordination
857	M_FIF		Mother/female head of household - adapt situation feel - view
858	M_FMNHR		Mother/female head of household - female mean hourly earn
859	M_FMNYR		Mother/female head of household - female mean annual earn
860	M_FNGRDX		Mother/Female head of household - finger dexterity
861	M_FRMPRC		Mother/Female head of household - form perception
862	M_GED		Mother/female head of household - general educational development
863	M_HAZARD		Mother/Female head of household - hazards
864	M_HEAT		Mother/Female head of household - extreme heat
865	M_INFLU		Mother/Female head of household - adapt influence ideas
866	M_INTELL		Mother/Female head of household - intelligence aptitude
867	M_MACHPR		Mother/female head of household - activities with machines
868	M_MCHNPR		Mother/Female head of household - machine preference
869	M_MEN		Mother/Female head of household - men in occupation 1979
870	M_MMNHR		Mother/female head of household - male mean hourly earn
871	M_MMNYR		Mother/female head of household - male mean annual earn
872	M_MNLDXT		Mother/Female head of household - manual dexterity
873	M_MTRCRD		Mother/Female head of household - motor coordination
874	M_MVC		Mother/Female head of household - adapt general measures
875	M_NOISE		Mother/Female head of household - noise or vibrations
876	M_NUMERC		Mother/Female head of household - numerical aptitude
877	M_OBSPRE		Mother/female head of household - activities with objects
878	M_OUT		Mother/Female head of household - performed outdoors
879	M_PEOPLE		Mother/female head of household - complexity with people
880	M_PEOPRE		Mother/Female head of household - work for presumed good
881	M_PHYSDM		Mother/Female head of household - physical demands
882	M_PRODPR		Mother/Female head of household - productive preference
883	M_PROTPR		Mother/female head of household - tangible productive satisfaction
884	M_PRSTPR		Mother/Female head of household - prestige of others
885	M_PUS		Mother/Female head of household - adapt perform stress
886	M_REACH		Mother/Female head of household - reaching handling feel
887	M_REPCON		Mother/Female head of household - adapt repetitive work
888	M_ROUTPR		Mother/Female head of household - routine activities
889	M_SCINPR		Mother/Female head of household - scientific activities
890	M_SEE		Mother/Female head of household - seeing
891	M_SJC		Mother/female head of household - adapt general judgmental
892	M_SPATIA		Mother/Female head of household - spatial aptitude
893	M_STOOP		Mother/Female head of household - stoop kneel and crawl
894	M_STRGTH		Mother/Female head of household - strength
895	M_STS		Mother/female head of household - adapt to situation limits
896	M_SVP		Mother/Female head of household - specific vocation prep
897	M_TALK		Mother/Female head of household - talking or hearing
898	M_THINGS		Mother/Female head of household - complexity of things
899	M_TRAIN		Mother/Female head of household - training times
900	M_VARCH		Mother/Female head of household - adapt multiple duties
901	M_VERBAL		Mother/Female head of household - verbal aptitude
902	M_WET		Mother/female head of household - wet and humid condition
903	M_WOMEN		Mother/female head of household - women in occupation 1979
904	MINDUS_M		Mother/Female head of household - 1 if missing industry code
905	PROFID_M		Mother/female head of household - professional / related services
906	AGRIC_M		Mother/female head of household - agriculture, forestry, fishery, mining
907	CONSTR_M		Mother/Female head of household - construction
908	MANUF_M		Mother/Female head of household - manufacturing
909	TRANSP_M		Mother/female head of household - transportation, communication, public utility
910	WHOLE_M		Mother/Female head of household - wholesale trade
911	RETAIL_M		Mother/Female head of household - retail trade
912	FNANCE_M		Mother/female head of household - finance, insurance, real estate
913	BUSIN_M		Mother/Female head of household - business and repair services
914	PERSON_M		Mother/Female head of household - personal services
915	ENTERT_M		Mother/female head of household - entertainment, recreation services
916	PUBADM_M		Mother/Female head of household - public administration
917	MOCCUP_M		Mother/Female head of household - 1 if missing occupation code
918	EXEC_M		Mother/female head of household - executive, administrative, managerial
919	PROFOC_M		Mother/Female head of household - professional specialty
920	TECH_M		Mother/Female head of household - technicians / related support
921	SALES_M		Mother/Female head of household - sales occupations
922	ADMIN_M		Mother/female head of household - administrative support, including clerical
923	SERV_M		Mother/Female head of household - service occupations
924	FARM_M		Mother/Female head of household - farming, forestry, fishing
925	CRAFT_M		Mother/female head of household - precision production, craft, repair
926	OPERAT_M		Mother/Female head of household - operator, laborer, military
927	A1PC14	N	Family on welfare or Aid to Dependent Children (ADC)
928	A1PC15	N	How often on welfare
929	A1PD1	N	Satisfied with life at present
930	A1PD2	N	Control over life in general at present
931	A1PD3	N	Satisfied with self at present
932	A1PD8	N	Rate contribution to others (whole life)
933	A1PD9	N	Disappointed by achievement (agree, disagree)
934	A1PD9A	N	Disappointed by achievement (agree/disagree level)
935	A1PD4	N	Outgoing describes you
936	A1PD5	N	Worrying describes you
937	A1PD6	N	Curious describes you
938	A1PD7	N	Optimistic describes you
939	A1SA1	N	Rate health current
940	A1SA2	N	Rate health 10 years ago
941	A1SHLTCH	Y	Change in health status
942	A1SA3	N	Rate health 10 years future
943	A1SHLTEX	Y	Change in health expectations
944	A1SA4	N	Rate control over health
945	A1SA5	N	Rate thought/effort put into health
946	A1SSATIS	Y	Life Satisfaction (5-item version)
947	A1SA6A	N	Compare energy now to 5 years ago
948	A1SA6B	N	Compare fitness now to 5 years ago
949	A1SA6C	N	Compare physique/figure now to 5 years ago
950	A1SA6D	N	Compare weight now to 5 years ago
951	A1SA7A	N	Keeping healthy depends on things I do
952	A1SA7B	N	Things I can do to reduce heart attack risk
953	A1SA7C	N	Things I can do to reduce cancer risk
954	A1SA7D	N	I work hard at trying to stay healthy
955	A1SA7E	N	Getting better is in doctor's hands
956	A1SA7F	N	Difficult to get good medical care
957	A1SHLOCS	Y	Health locus of control - Self
958	A1SHLOCO	Y	Health locus of control - Others
959	A1SA8A	N	Often aware of various things in my body
960	A1SA8B	N	Sudden loud noises really bother me
961	A1SA8C	N	Hate to be too hot/too cold
962	A1SA8D	N	Quick to sense hunger contractions
963	A1SA8E	N	Low pain tolerance
964	A1SAMOLI	Y	Somatic amplification
965	A1SA9A	N	Asthma/bronchitis/emphysema ever (12 months)
966	A1SA9B	N	Tuberculosis ever (12 months)
967	A1SA9C	N	Other lung problems ever (12 months)
968	A1SA9D	N	Joint/bone diseases ever (12 months)
969	A1SA9E	N	Sciatica/lumbago/backache ever (12 months)
970	A1SA9F	N	Skin trouble persistent ever (12 months)
971	A1SA9G	N	Thyroid disease ever (12 months)
972	A1SA9H	N	Hay fever ever (12 months)
973	A1SA9I	N	Stomach trouble ever (12 months)
974	A1SA9J	N	Urinary/bladder problem ever (12 months)
975	A1SA9K	N	Constipated all/most ever (12 months)
976	A1SA9L	N	Gall bladder trouble ever (12 months)
977	A1SA9M	N	Foot trouble persistent ever (12 months)
978	A1SA9N	N	Varicose veins ever (12 months)
979	A1SA9O	N	AIDS/HIV ever (12 months)
980	A1SA9P	N	Lupus/autoimmune disorder ever (12 months)
981	A1SA9Q	N	Gum/mouth trouble persistent ever (12 months)
982	A1SA9R	N	Teeth trouble persistent ever (12 months)
983	A1SA9S	N	High blood pressure/hypertension ever (12 months)
984	A1SA9T	N	Anxiety/depression ever (12 months)
985	A1SA9U	N	Alcohol/drug problem ever (12 months)
986	A1SA9V	N	Migraine headaches ever (12 months)
987	A1SA9W	N	Chronic sleep problems ever (12 months)
988	A1SA9X	N	Diabetes/high blood sugar ever (12 months)
989	A1SA9Y	N	Neurological disorder ever (12 months)
990	A1SA9Z	N	Stroke ever (12 months)
991	A1SA9AA	N	Ulcer ever (12 months)
992	A1SA9BB	N	Hernia ever (12 months)
993	A1SA9CC	N	Piles/hemorrhoids ever (12 months)
994	A1SCHRON	Y	Number of chronic conditions (12 months)
995	A1SCHROX	Y	Having any chronic conditions (12 months)
996	A1SA10A	N	Prescription medicine for hypertension ever (30 days)
997	A1SA10B	N	Prescription medicine for diabetes ever (30 days)
998	A1SA10C	N	Prescription medicine for cholesterol ever (30 days)
999	A1SA10D	N	Prescription medicine for heart condition ever (30 days)
1000	A1SA10E	N	Prescription medicine for lung problems ever (30 days)
1001	A1SA10F	N	Prescription medicine for ulcer ever (30 days)
1002	A1SA10G	N	Prescription medicine for arthritis ever (30 days)
1003	A1SA10H	N	Prescription medicine for hormone therapy ever (30 days)
1004	A1SA10I	N	Prescription medicine for birth control ever (30 days)
1005	A1SA10J	N	Prescription medicine for headaches ever (30 days)
1006	A1SA10K	N	Prescription medicine for anxiety/depression ever (30 days)
1007	A1SRXMED	Y	Total number of prescription medicines taking (30 days)
1008	A1SRXMEX	Y	Took any prescription medicine (30 days)
1009	A1SA11A	N	Takes multi-vitamins regularly
1010	A1SA11B	N	Takes vitamin C regularly
1011	A1SA11C	N	Takes iron regularly
1012	A1SA11D	N	Takes calcium regularly
1013	A1SA11E	N	Takes other supplement regularly
1014	A1SVITAM	Y	Takes any supplements Regularly
1015	A1SA12A	N	Headaches frequency (30 days)
1016	A1SA12B	N	Backaches frequency (30 days)
1017	A1SA12C	N	Sweat frequency (30 days)
1018	A1SA12D	N	Irritability frequency (30 days)
1019	A1SA12E	N	Hot flushes/flashes frequency (30 days)
1020	A1SA12F	N	Aches/joint stiffness frequency (30 days)
1021	A1SA12G	N	Falling/staying sleep frequency (30 days)
1022	A1SA12H	N	Leaking urine frequency (30 days)
1023	A1SA12I	N	Intercourse pain/discomfort frequency (30 days)
1024	A1SSYMPT	Y	Symptoms of headaches etc.
1025	A1SA13A	N	Felt so sad nothing could cheer frequency (30 days)
1026	A1SA13B	N	Felt nervous frequency (30 days)
1027	A1SA13C	N	Felt restless frequency (30 days)
1028	A1SA13D	N	Felt hopeless frequency (30 days)
1029	A1SA13E	N	Felt everything was effort frequency (30 days)
1030	A1SA13F	N	Felt worthless frequency (30 days)
1031	A1SNEGAF	Y	Negative affect
1032	A1SA14	N	More or less than usual negative feelings (30 days)
1033	A1SA15A	N	Felt cheerful frequency (30 days)
1034	A1SA15B	N	Felt good spirits frequency (30 days)
1035	A1SA15C	N	Felt extremely happy frequency (30 days)
1036	A1SA15D	N	Felt calm and peaceful frequency (30 days)
1037	A1SA15E	N	Felt satisfied frequency (30 days)
1038	A1SA15F	N	Felt full of life frequency (30 days)
1039	A1SPOSAF	Y	Positive affect
1040	A1SA16		More or less than usual positive feelings (30 days)
1041	A1SA17A		Health limits lifting/carrying groceries
1042	A1SA17B		Health limits bathing/dressing self
1043	A1SA17C		Health limits climb several flights of stairs
1044	A1SA17D		Health limits bending/kneeling/stooping
1045	A1SA17E		Health limits walking more than one mile
1046	A1SA17F		Health limits walking several blocks
1047	A1SA17G		Health limits walking one block
1048	A1SA17H		Health limits vigorous activity
1049	A1SA17I		Health limits moderate activity
1050	A1SBADL	Y	Basic Activities of Daily Living (ADL) (2-item version)
1051	A1SIADL	Y	Instrumental Activities of Daily Living (ADL)
1052	A1SA18		Summer vigorous activity
1053	A1SA19		Winter vigorous activity
1054	A1SVIGOR		Times/month vigorous activity
1055	A1SA20		Summer moderate activity
1056	A1SA21		Winter moderate activity
1057	A1SMODER	N	Times/month moderate activity
1058	A1SA22A		Short breath hurry ground/walk slight hill
1059	A1SA22B		Short breath walk with peer level ground
1060	A1SA22C		Short breath walk own pace level ground
1061	A1SA22D		Short breath washing/dressing
1062	A1SDYSPN	Y	Progressive levels of dyspnea
1063	A1SA23		Waist around navel (inches)
1064	A1SA24	N	Hips at widest point (inches)
1065	A1SWSTHI	N	Waist-to-hip ratio
1066	A1SA25	N	Height (inches)
1067	A1SA26		Perception of weight (over, under, etc)
1068	A1SA27		Weight current (pounds)
1069	A1SBMI	N	Body mass index
1070	A1SA28		Weight 1 year ago (pounds)
1071	A1SA29	N	Weight when 21 years old
1072	A1SA30A		Lose 10 pounds because of health problem
1073	A1SA30B		Lose 10 pounds by diet or exercise
1074	A1SA30C		Lose 10 pounds by other reason
1075	A1SA31		Number of times lost 10 pounds or more (10 years)
1076	A1SA32		Anesthesia ever
1077	A1SA32A		Anesthesia most recent year
1078	A1SA33		Number of times hospitalized overnight (12 months)
1079	A1SA33A		Total number of nights in hospital (12 months)
1080	A1SA34		Place for medical care
1081	A1SA35		One doctor seen for medical care
1082	A1SA36A	N	Number of times physical routine exam (12 months)
1083	A1SA36B	N	Number of times dental routine exam (12 months)
1084	A1SA36C	N	Number of times urgent care (12 months)
1085	A1SA36D	N	Number of times scheduled treatment/surgery (12 months)
1086	A1SUSEMD	Y	Number of times seeing medical doctor (12 months)
1087	A1SA37A	N	Number of times psychiatrist for mental health (12 months)
1088	A1SA37B	N	Number of times general doctor for mental health (12 months)
1089	A1SA37C	N	Number of times counselor for mental health (12 months)
1090	A1SA37D	N	Number of times religious for mental health (12 months)
1091	A1SUSEMH	Y	Number of times saw mental health professional (12 months)
1092	A1SA38A	N	Ever attended substance problems group
1093	A1SA38AY	N	First age substance problems group
1094	A1SA38AZ	N	Number of times substance problems group
1095	A1SA38B	N	Ever attended emotional problems group
1096	A1SA38BY	N	First age attended emotional problems group
1097	A1SA38BZ	N	Number of times attended emotional problems group
1098	A1SA38C	N	Ever attended eating problems group
1099	A1SA38CY	N	First age eating problems group
1100	A1SA38CZ	N	Number of times eating problems group
1101	A1SA38D	N	Ever attended loss of loved one group
1102	A1SA38DY	N	First age attended loss of loved one group
1103	A1SA38DZ	N	Number of times attended loss of loved one group
1104	A1SA38E	N	Ever attended life transitions group
1105	A1SA38EY	N	First age attended life transitions group
1106	A1SA38EZ	N	Number of times attended life transitions group
1107	A1SA38F	N	Ever attended survivors group
1108	A1SA38FY	N	First age attended survivors group
1109	A1SA38FZ	N	Number of times attended survivors group
1110	A1SA38G	N	Ever attended physical disabilities group
1111	A1SA38GY	N	First age attended physical disabilities group
1112	A1SA38GZ	N	Number of times attended physical disabilities group
1113	A1SA38H	N	Ever attended parent support group
1114	A1SA38HY	N	First age attended parent support group
1115	A1SA38HZ	N	Number of times attended parent support group
1116	A1SA38I	N	Ever attended family with illness group
1117	A1SA38IY	N	First age attended family with illness group
1118	A1SA38IZ	N	Number of times attended family with illness group
1119	A1SA38J	N	Ever attended family with emotional/substance group
1120	A1SA38JY	N	First age attended family with emotional/substance group
1121	A1SA38JZ	N	Number of times attended family with emotional/substance group
1122	A1SA38K	N	Ever attended other self-help/support group
1123	A1SA38KY	N	First age attend other self-help/support group
1124	A1SA38KZ	N	Number of times attend other self-help/support group
1125	A1SA39A	N	Acupuncture frequency (12 months)
1126	A1SA39B	N	Biofeedback frequency (12 months)
1127	A1SA39C	N	Chiropractor frequency (12 months)
1128	A1SA39D	N	Energy healing frequency (12 months)
1129	A1SA39E	N	Exercise/movement therapy frequency (12 months)
1130	A1SA39F	N	Herbal therapy frequency (12 months)
1131	A1SA39G	N	High dose mega-vitamins frequency (12 months)
1132	A1SA39H	N	Homeopathy frequency (12 months)
1133	A1SA39I	N	Hypnosis frequency (12 months)
1134	A1SA39J	N	Imagery techniques frequency (12 months)
1135	A1SA39K	N	Massage therapy frequency (12 months)
1136	A1SA39L	N	Prayer/other spiritual frequency (12 months)
1137	A1SA39M	N	Relaxation/mediation frequency (12 months)
1138	A1SA39N	N	Special diet frequency (12 months)
1139	A1SA39O	N	Spiritual healing by others frequency (12 months)
1140	A1SA39P	N	Other non-traditional therapy frequency (12 months)
1141	A1SALTER	N	Used alternative medical treatment
1142	A1SA40A	N	Used sedatives on own ever (12 months)
1143	A1SA40B	N	Used tranquilizers on own ever (12 months)
1144	A1SA40C	N	Used stimulants on own ever (12 months)
1145	A1SA40D	N	Used painkillers on own ever (12 months)
1146	A1SA40E	N	Used depress medications on own ever (12 months)
1147	A1SA40F	N	Used inhalants on own ever (12 months)
1148	A1SA40G	N	Used marijuana/hashish on own ever (12 months)
1149	A1SA40H	N	Used cocaine/crack on own ever (12 months)
1150	A1SA40I	N	Used lysergic acid diethylamide (LSD)/other hallucinogens on own ever (12 months)
1151	A1SA40J	N	Used heroin on own ever (12 months)
1152	A1SA41	N	Number of times substance more than intended (12 months)
1153	A1SA42	N	Number of times substance effects at work/etc. (12 months)
1154	A1SA43A	N	Substance increased chance of hurt (12 months)
1155	A1SA43B	N	Emotional problems from substance (12 months)
1156	A1SA43C	N	Strong desire for substance (12 months)
1157	A1SA43D	N	A month or more a lot time using substance (12 months)
1158	A1SA43E	N	Needed more substance to get effect (12 months)
1159	A1SA44A	N	Got hurt from drinking (12 months)
1160	A1SA44B	N	Emotional problems from drinking (12 months)
1161	A1SA44C	N	Desire/urge from drinking (12 months)
1162	A1SA44D	N	A month or more much time drinking (12 months)
1163	A1SA44E	N	Had drink more to get effects (12 months)
1164	A1SA45	N	Number of times alcohol more than intended (12 months)
1165	A1SA46	N	Number of times alcohol effects at work/etc. (12 months)
1166	A1SB1	N	Age 1st menstrual period
1167	A1SB2	N	Menstrual discomfort before
1168	A1SB3	N	Menstrual discomfort during
1169	A1SB4	N	Relief or regret menstrual periods stop
1170	A1SB5A	N	Pain relievers for menopausal symptoms
1171	A1SB5B	N	Sleeping pills for menopausal symptoms
1172	A1SB5C	N	Cream/jellies for menopausal symptoms
1173	A1SB6	N	Hormone replacement
1174	A1SB6A	N	Age started hormone replacement
1175	A1SB6B	N	Still taking hormone replacement
1176	A1SB6C	N	Age stopped hormone replacement
1177	A1SB7A1	N	Operation hysterectomy
1178	A1SB7A2	N	Age had hysterectomy
1179	A1SB7B1	N	Operation removal uterus and 1 ovary
1180	A1SB7B2	N	Age had removal uterus and 1 ovary
1181	A1SB7C1	N	Operation removal uterus and 2 ovaries
1182	A1SB7C2	N	Age had removal uterus and 2 ovaries
1183	A1SB7D1	N	Operation removal one ovary
1184	A1SB7D2	N	Age had removal one ovary
1185	A1SB7E1	N	Operation removal both ovaries
1186	A1SB7E2	N	Age had removal both ovaries
1187	A1SB7F1	N	Operation tubal ligation
1188	A1SB7F2	N	Age had tubal ligation
1189	A1SB8A	N	Worry about infertility as get older
1190	A1SB8B	N	Worry about less attractive as get older
1191	A1SB8C	N	Worry about illness as get older
1192	A1SB9	N	Menstrual period stopped
1193	A1SB9A	N	Age of last menstrual period
1194	A1SB10	N	Had menstrual period last 3 months (regular)
1195	A1SB10A	N	Number of days between periods less predict now
1196	A1SB10B	N	Menstrual flow lighter, heavier, same
1197	A1SB10C	N	Why no period
1198	A1SC1A	N	Respondent - Insurer directly provides health insurance
1199	A1SC1B	N	Respondent - Employer provides health insurance
1200	A1SC1C	N	Respondent - Spouse/partner's employer provides health insurance
1201	A1SC1D	N	Respondent - Union provides health insurance
1202	A1SC1E	N	Respondent - Spouse/partner's union provides health insurance
1203	A1SC1F	N	Respondent - Medicare provides health insurance
1204	A1SC1G	N	Respondent - Medicaid/other provide health insurance
1205	A1SC1H	N	Respondent - Military provides health insurance
1206	A1SC2	N	Respondent - Mental health visits covered by health insurance
1207	A1SC3A	N	Employer health insurance available
1208	A1SC3B	N	Spouse/partner's employer health insurance available
1209	A1SC3C	N	Union health insurance available
1210	A1SC3D	N	Spouse/partner's union health insurance available
1211	A1SC4A	N	Medicare health insurance available
1212	A1SC4B	N	Medicaid health insurance available
1213	A1SC4C	N	Military health insurance available
1214	A1SC5A	N	Spouse/partner - Insurer directly provides health insurance
1215	A1SC5B	N	Spouse/partner - Respondent's employer provides health insurance
1216	A1SC5C	N	Spouse/partner - Spouse/partner's own employer provides health insurance
1217	A1SC5D	N	Spouse/partner - Respondent's union provides health insurance
1218	A1SC5E	N	Spouse/partner - Spouse/partner's own union provides health insurance
1219	A1SC5F	N	Spouse/partner - Medicare provides health insurance
1220	A1SC5G	N	Spouse/partner - Medicaid/other provides health insurance
1221	A1SC5H	N	Spouse/partner - Military provides health insurance
1222	A1SC6	N	Spouse/partner - Mental health visits covered by health insurance
1223	A1SD1	N	Mothers past health
1224	A1SD2	N	Biological mother still alive
1225	A1SD2A	N	Age of biological mother
1226	A1SD2B	N	Rate physical health of biological mother
1227	A1SD2C	N	Death of biological mother (year)
1228	A1SD2D	N	Mother's age at time of death
1229	A1SD3	N	Fathers past health
1230	A1SD4	N	Biological father still alive
1231	A1SD4A	N	Age of biological father
1232	A1SD4B	N	Rate physical health of biological father
1233	A1SD4C	N	Death of biological father (year)
1234	A1SD4D	N	Father's age at time of death
1235	A1SE2	N	Born in United States
1236	A1SE3	N	Mother born in United States
1237	A1SE4	N	Father born in United States
1238	A1SE5	N	Language spoken
1239	A1SE6	N	Religion importance
1240	A1SE7	N	Area where raised
1241	A1SE8	N	Number of times moved to new neighborhood
1242	A1SE9	N	Financial level growing up
1243	A1SE10	N	Parents financial level when they were age you are now
1244	A1SE11	N	Chores growing up
1245	A1SE12	N	Rules on how to spend time
1246	A1SE13	N	Mother - Relationship with
1247	A1SE14A	N	Mother - Understand problems
1248	A1SE14B	N	Mother - Confide in her
1249	A1SE14C	N	Mother - Love and affection
1250	A1SE14D	N	Mother - Time and attention
1251	A1SE14E	N	Mother - Upbringing
1252	A1SE14F	N	Mother - Strictness
1253	A1SE14G	N	Mother - Consistent rules
1254	A1SE14H	N	Mother - Punishment
1255	A1SE14I	N	Mother - Stop from doing things
1256	A1SE14J	N	Mother - Do best
1257	A1SE14K	N	Mother - Teach about life
1258	A1SE14L	N	Mother - Generosity
1259	A1SE14M	N	Mother - Sociable and friendly
1260	A1SEMA	Y	Maternal affection
1261	A1SEMD	Y	Maternal discipline
1262	A1SMMOD	Y	Maternal model of generosity
1263	A1SE15	N	Father - Relationship with
1264	A1SE16A	N	Father - Understand problems
1265	A1SE16B	N	Father - Confide in father
1266	A1SE16C	N	Father - Love and affection
1267	A1SE16D	N	Father - Time and attention
1268	A1SE16E	N	Father - Upbringing
1269	A1SE16F	N	Father - Strictness
1270	A1SE16G	N	Father - Consistent rules
1271	A1SE16H	N	Father - Punishment
1272	A1SE16I	N	Father - Stop from doing things
1273	A1SE16J	N	Father - Do best
1274	A1SE16K	N	Father - Teach about life
1275	A1SE16L	N	Father - Generosity
1276	A1SE16M	N	Father - Sociable and friendly
1277	A1SEFA	Y	Paternal affection
1278	A1SEFD	Y	Paternal discipline
1279	A1SEFMOD	Y	Paternal model of generosity
1280	A1SEMAPA	Y	Parental affection
1281	A1SE17A	N	Emotional abuse - mother
1282	A1SE17B	N	Emotional abuse - father
1283	A1SE17C	N	Emotional abuse - brothers
1284	A1SE17D	N	Emotional abuse - sisters
1285	A1SE17E	N	Emotional abuse - anyone else
1286	A1SE17F	N	Physical abuse - mother
1287	A1SE17G	N	Physical abuse - father
1288	A1SE17H	N	Physical abuse - brother
1289	A1SE17I	N	Physical abuse - sister
1290	A1SE17J	N	Physical abuse - anyone else
1291	A1SE17K	N	Severe physical abuse - mother
1292	A1SE17L	N	Severe physical abuse - father
1293	A1SE17M	N	Severe physical abuse - brother
1294	A1SE17N	N	Severe physical abuse - sister
1295	A1SE17O	N	Severe physical abuse - anyone else
1296	A1SE18A	N	Number of older brothers
1297	A1SE18B	N	Number of younger brothers
1298	A1SE18C	N	Number of brothers same age
1299	A1SE19A	N	Number of older sisters
1300	A1SE19B	N	Number of younger sisters
1301	A1SE19C	N	Number of sisters same age
1302	A1SF1A	N	Like most aspects of my personality
1303	A1SF1B	N	Pleased with how life turned out
1304	A1SF1C	N	Some wander aimlessly, but not me
1305	A1SF1D	N	Demands of everyday life often get me down
1306	A1SF1E	N	Disappointed about achievements in life
1307	A1SF1F	N	Maintaining close relationships difficult
1308	A1SF1G	N	Live life day by day, don't think about future
1309	A1SF1H	N	In charge of situation in which I live
1310	A1SF1I	N	Good managing daily responsibilities
1311	A1SF1J	N	Done all there is to do in life
1312	A1SF1K	N	Life process of learning/changing/growth
1313	A1SF1L	N	Experience challenge how think important
1314	A1SF1M	N	Others describe me as giving/share time
1315	A1SF1N	N	Gave up try making improvements long ago
1316	A1SF1O	N	Influenced by people with strong opinions
1317	A1SF1P	N	No experience warm and trusting relationships
1318	A1SF1Q	N	Confidence in my opinions even if contrary
1319	A1SF1R	N	Judge self by what I think is important
1320	A1SF1S	N	Little can do to change important things
1321	A1SF1T	N	Helpless dealing with problems of life
1322	A1SF1U	N	Do just about anything I set my mind to
1323	A1SF1V	N	Others determine what I can and cannot do
1324	A1SF1W	N	What happens in life is beyond my control
1325	A1SF1X	N	When really want something, find way
1326	A1SF1Y	N	Many things interfere with what I want do
1327	A1SF1Z	N	Whether I get what want is in own hands
1328	A1SF1AA	N	Little control over things happen to me
1329	A1SF1BB	N	Really no way I can solve problems I have
1330	A1SF1CC	N	Feel pushed around in life
1331	A1SF1DD	N	Happens to me in future depends on me
1332	A1SCTRL	Y	Sense of control (mastery + constraints)
1333	A1SPWBA	Y	Autonomy (psychological well-being 3-item)
1334	A1SPWBE	Y	Environmental mastery (psychological well-being 3-item)
1335	A1SPWBG	Y	Personal growth (psychological well-being 3-item)
1336	A1SPWBR	Y	Positive relations with others (psychological well-being 3-item)
1337	A1SPWBU	Y	Purpose in life (psychological well-being 3-item)
1338	A1SPWBS	Y	Self-acceptance (psychological well-being 3-item)
1339	A1SCONST	Y	Perceived constraints
1340	A1SMASTE	Y	Personal mastery
1341	A1SF2A	N	Women can have full and happy lives without marrying
1342	A1SF2B	N	Employed mothers can have just as good a relationship with children
1343	A1SF2C	N	Children need to be raised in a family with both parents
1344	A1SF2D	N	Men should share equally with their wives
1345	A1SF2E	N	Men can have full and happy lives without marrying
1346	A1SF2F	N	Women can have full and happy lives without any children
1347	A1SF2G	N	Men can have full and happy lives without any children
1348	A1SF2H	N	Partner who puts in the fewest hours at work should do most household chores
1349	A1SF2I	N	Partner who earns the least money should do most household chores
1350	A1SF2J	N	Single parents can rear children just as well as married adults
1351	A1SF2K	N	Men should share equally with their wives in taking care of children
1352	A1SMAR	Y	Can be happy without marry
1353	A1SFAM	Y	Can be happy without marry or children
1354	A1SF3A	N	Where there's a will there's a way
1355	A1SF3B	N	Do what can to change for better
1356	A1SF3C	N	If expectation not being met, lower them
1357	A1SF3D	N	To avoid disappointments, don't set goals too high
1358	A1SF3E	N	Learn meaningful from difficult situation
1359	A1SF3F	N	Relieved when let go of responsibilities
1360	A1SF3G	N	Even when feel too much, get it all done
1361	A1SF3H	N	Find different way of looking at things
1362	A1SF3I	N	Remind myself I can't do everything
1363	A1SF3J	N	When problems, don't give up until solve them
1364	A1SF3K	N	Rarely give up even when get tough
1365	A1SF3L	N	Can't get want, assume goals unrealistic
1366	A1SF3M	N	When go wrong, usually find bright side
1367	A1SF3N	N	Find positive even in worst situations
1368	A1SF3O	N	Like to make plans for future
1369	A1SF3P	N	Know what I want out of life
1370	A1SF3Q	N	I live one day at a time
1371	A1SF3R	N	Head off bad thing before happen
1372	A1SF3S	N	Can sense opportunities
1373	A1SF3T	N	Helpful to set goals for near future
1374	A1SF3U	N	Too many things today to worry about tomorrow
1375	A1SF3V	N	Past helps me figure out what do present
1376	A1SF3W	N	No use in thinking about past because nothing can be done
1377	A1SF3X	N	Bad happens, think how could prevented
1378	A1SF3Y	N	Too busy to think yesterday
1379	A1SF3Z	N	Good predicting my future
1380	A1SF3AA	N	Good at figuring how things turn out
1381	A1SF3BB	N	No sense in planning too far ahead
1382	A1SF3CC	N	Make sense of what happened
1383	A1SF3DD	N	Insights into way things turn out
1384	A1SF3EE	N	Don't like ask others for help unless have to
1385	A1SF3FF	N	Deal with own problems myself
1386	A1SF3GG	N	Asking others comes naturally for me
1387	A1SF3HH	N	Not let other know when things bad
1388	A1SF3II	N	Like advice before making decision
1389	A1SF3JJ	N	Feel better if talk when upset
1390	A1SF3KK	N	Prefer to make decisions on own
1391	A1SPERSI	Y	Persist in goal striving (primary control)
1392	A1SCHANG	Y	Lower aspirations (secondary control)
1393	A1SREAPP	Y	Positive reappraisal (secondary control)
1394	A1SDIREC	Y	Self-directedness and planning
1395	A1STODAY	Y	Live for today
1396	A1SFORSG	Y	Foresight and anticipation
1397	A1SINSGH	Y	Insight into past
1398	A1SSUFFI	Y	Self-sufficiency
1399	A1SADVIC	Y	Advice seeking
1400	A1SF4A	N	Outgoing describes you how well
1401	A1SF4B	N	Helpful describes you how well
1402	A1SF4C	N	Moody describes you how well
1403	A1SF4D	N	Organized describes you how well
1404	A1SF4E	N	Self-confident describes you how well
1405	A1SF4F	N	Friendly describes you how well
1406	A1SF4G	N	Warm describes you how well
1407	A1SF4H	N	Worrying describes you how well
1408	A1SF4I	N	Responsible describes you how well
1409	A1SF4J	N	Forceful describes you how well
1410	A1SF4K	N	Lively describes you how well
1411	A1SF4L	N	Caring describes you how well
1412	A1SF4M	N	Nervous describes you how well
1413	A1SF4N	N	Creative describes you how well
1414	A1SF4O	N	Assertive describes you how well
1415	A1SF4P	N	Hardworking describes you how well
1416	A1SF4Q	N	Imaginative describes you how well
1417	A1SF4R	N	Softhearted describes you how well
1418	A1SF4S	N	Calm describes you how well
1419	A1SF4T	N	Outspoken describes you how well
1420	A1SF4U	N	Intelligent describes you how well
1421	A1SF4V	N	Curious describes you how well
1422	A1SF4W	N	Active describes you how well
1423	A1SF4X	N	Careless describes you how well
1424	A1SF4Y	N	Broad minded describes you how well
1425	A1SF4Z	N	Sympathetic describes you how well
1426	A1SF4AA	N	Talkative describes you how well
1427	A1SF4BB	N	Sophisticated describes you how well
1428	A1SF4CC	N	Adventurous describes you how well
1429	A1SF4DD	N	Dominant describes you how well
1430	A1SAGENC	Y	Agency personality trait
1431	A1SAGREE	Y	Agreeableness personality trait
1432	A1SEXTRA	Y	Extraversion personality trait
1433	A1SNEURO	Y	Neuroticism personality trait
1434	A1SCONS	Y	Conscientiousness personality trait
1435	A1SOPEN	Y	Openness personality trait
1436	A1SF5A	N	How calm now
1437	A1SF5B	N	How calm 10 years ago
1438	A1SF5C	N	How calm 10 years ahead
1439	A1SF5D	N	How willing to learn now
1440	A1SF5E	N	How willing to learn 10 years ago
1441	A1SF5F	N	How willing to learn 10 years ahead
1442	A1SF5G	N	How energetic now
1443	A1SF5H	N	How energetic 10 years ago
1444	A1SF5I	N	How energetic 10 years ahead
1445	A1SF5J	N	How caring now
1446	A1SF5K	N	How caring 10 years ago
1447	A1SF5L	N	How caring 10 years ahead
1448	A1SF5M	N	How wise now
1449	A1SF5N	N	How wise 10 years ago
1450	A1SF5O	N	How wise 10 years ahead
1451	A1SF5P	N	How knowledgeable now
1452	A1SF5Q	N	How knowledgeable 10 years ago
1453	A1SF5R	N	How knowledgeable 10 years ahead
1454	A1SF6A	N	Choose goals - Focus or keep options open
1455	A1SF6B	N	Reach goals - Practice skill or opportunities
1456	A1SF6C	N	Have no skill for goal - Seek or reconsider
1457	A1SF7A	N	Focus on a few goals 10 years ago
1458	A1SF7B	N	Work hard to reach goals 10 years ago
1459	A1SF7C	N	Do what can to reach goals 10 years ago
1460	A1SF8A	N	Focus on a few goals 10 years ahead
1461	A1SF8B	N	Work hard to reach goals 10 years ahead
1462	A1SF8C	N	Do what can to reach goals 10 years ahead
1463	A1SG1A	N	Calm in late 20s
1464	A1SG1B	N	Calm in late 40s
1465	A1SG1C	N	Calm in late 60s
1466	A1SG1D	N	Willing to learn in late 20s
1467	A1SG1E	N	Willing to learn in late 40s
1468	A1SG1F	N	Willing to learn in late 60s
1469	A1SG1G	N	Energetic in late 20s
1470	A1SG1H	N	Energetic in late 40s
1471	A1SG1I	N	Energetic in late 60s
1472	A1SG1J	N	Caring in late 20s
1473	A1SG1K	N	Caring in late 40s
1474	A1SG1L	N	Caring in late 60s
1475	A1SG1M	N	Wise in late 20s
1476	A1SG1N	N	Wise in late 40s
1477	A1SG1O	N	Wise in late 60s
1478	A1SG1P	N	Knowledgeable in late 20s
1479	A1SG1Q	N	Knowledgeable in late 40s
1480	A1SG1R	N	Knowledgeable in late 60s
1481	A1SG2A	N	Rate physical health in late 20s
1482	A1SG2B	N	Rate physical health in late 40s
1483	A1SG2C	N	Rate physical health in late 60s
1484	A1SG2D	N	Rate contribution to others in late 20s
1485	A1SG2E	N	Rate contribution to others in late 40s
1486	A1SG2F	N	Rate contribution to others in late 60s
1487	A1SG2G	N	Rate marriage/relation in late 20s
1488	A1SG2H	N	Rate marriage/relation in late 40s
1489	A1SG2I	N	Rate marriage/relation in late 60s
1490	A1SG2J	N	Rate relation with children in late 20s
1491	A1SG2K	N	Rate relation with children in late 40s
1492	A1SG2L	N	Rate relation with children in late 60s
1493	A1SG2M	N	Rate work situation in late 20s
1494	A1SG2N	N	Rate work situation in late 40s
1495	A1SG2O	N	Rate work situation in late 60s
1496	A1SG2P	N	Rate finance situation in late 20s
1497	A1SG2Q	N	Rate finance situation in late 40s
1498	A1SG2R	N	Rate finance situation in late 60s
1499	A1SG2S	N	Rate overall life in late 20s
1500	A1SG2T	N	Rate overall life in late 40s
1501	A1SG2U	N	Rate overall life in late 60s
1502	A1SG3	N	Age feel like most of the time
1503	A1SG4	N	Age would like to be
1504	A1SG5	N	Age men enter middle age
1505	A1SG6	N	Age men no longer middle age
1506	A1SG7	N	Age women enter middle age
1507	A1SG8	N	Age women no longer middle age
1508	A1SH1	N	Career psychological turning point
1509	A1SH2	N	Upset for friend psychological turning point
1510	A1SH3	N	Happy for friend psychological turning point
1511	A1SH4	N	Upset for self psychological turning point
1512	A1SH5	N	Happy for self psychological turning point
1513	A1SH6	N	Fulfill dream
1514	A1SH7	N	Give up dream
1515	A1SI1A1	N	Working full time 10 years ago
1516	A1SI1A2	N	Working full time now
1517	A1SI1A3	N	Working full time 10 years ahead
1518	A1SI1B1	N	Working part time 10 years ago
1519	A1SI1B2	N	Working part time now
1520	A1SI1B3	N	Working part time 10 years ahead
1521	A1SI1C1	N	Self employed 10 years ago
1522	A1SI1C2	N	Self employed now
1523	A1SI1C3	N	Self employed 10 years ahead
1524	A1SI1D1	N	Volunteer 15 hours+ 10 years ago
1525	A1SI1D2	N	Volunteer 15 hours+ now
1526	A1SI1D3	N	Volunteer 15 hours+ 10 years ahead
1527	A1SI1E1	N	Full time student 10 years ago
1528	A1SI1E2	N	Full time student now
1529	A1SI1E3	N	Full time student 10 years ahead
1530	A1SI1F1	N	Part time student 10 years ago
1531	A1SI1F2	N	Part time student now
1532	A1SI1F3	N	Part time student 10 years ahead
1533	A1SI1G1	N	Primary caregiver for own kid 10 years ago
1534	A1SI1G2	N	Primary caregiver for own kid now
1535	A1SI1G3	N	Primary caregiver for own kid 10 years ahead
1536	A1SI1H1	N	Full time homemaker 10 years ago
1537	A1SI1H2	N	Full time homemaker now
1538	A1SI1H3	N	Full time homemaker 10 years ahead
1539	A1SI1I1	N	Unemployed 10 years ago
1540	A1SI1I2	N	Unemployed now
1541	A1SI1I3	N	Unemployed 10 years ahead
1542	A1SI1J1	N	Sick leave 10 years ago
1543	A1SI1J2	N	Sick leave now
1544	A1SI1J3	N	Sick leave 10 years ahead
1545	A1SI1K1	N	Retired 10 years ago
1546	A1SI1K2	N	Retired now
1547	A1SI1K3	N	Retired 10 years ahead
1548	A1SI2	N	Rate current work situation
1549	A1SI3	N	Rate work situation 10 years ago
1550	A1SI4	N	Rate work situation 10 years future
1551	A1SI5	N	Rate amount control over work situation
1552	A1SI6	N	Rate thought/effort put into work
1553	A1SI7	N	Age first worked paid job 6 months or more
1554	A1SI8	N	Number of years employed at least 6 months of year
1555	A1SI9	N	Number of years full-time employed
1556	A1SI10	N	Unemployed longest period (number of weeks)
1557	A1SI11	N	Main reason unemployed during longest period
1558	A1SI12A	N	Employment status in 1994
1559	A1SI12B	N	Employment status in 1993
1560	A1SI12C	N	Employment status in 1992
1561	A1SI12D	N	Employment status in 1991
1562	A1SI12E	N	Employment status in 1990
1563	A1SI12F	N	Employment status in 1989
1564	A1SI12G	N	Employment status in 1988
1565	A1SI12H	N	Employment status in 1987
1566	A1SI12I	N	Employment status in 1986
1567	A1SI12J	N	Employment status in 1985
1568	A1SI13A	N	Work paid number of weeks (12 months)
1569	A1SI13B	N	Unemployed number of weeks (12 months)
1570	A1SI13C	N	Unpaid leave number of weeks (12 months)
1571	A1SI13D	N	Not working or looking number of weeks (12 months)
1572	A1SI14	N	Work for pay currently
1573	A1SI15A	N	Work days in average week (frequency)
1574	A1SI15B	N	Work evenings in average week (frequency)
1575	A1SI15C	N	Work nights in average week (frequency)
1576	A1SI15D	N	Work weekends in average week (frequency)
1577	A1SI16	N	Time begin job - military time (HHMM)
1578	A1SI17	N	Time end job - military time (HHMM)
1579	A1SI18	N	Job commute time - number of minutes
1580	A1SI19	N	Problem with someone at work (12 months)
1581	A1SI20	N	Other ongoing stress at work (12 months)
1582	A1SI21	N	Chances could keep job for next 2 years
1583	A1SI22	N	Job effect on physical health
1584	A1SI23	N	Job effect on emotional/mental health
1585	A1SI24	N	Accident/injury risk at job
1586	A1SI25	N	Number of times injured at job in the past five years
1587	A1SI26	N	Seriousness of job injury
1588	A1SI27A	N	Job reduces effort to activities at home
1589	A1SI27B	N	Job stress makes irritable at home
1590	A1SI27C	N	Job makes too tired to do things at home
1591	A1SI27D	N	Job problems distract you at home
1592	A1SI27E	N	Job helps to deal with issues at home
1593	A1SI27F	N	Job makes you more interesting at home
1594	A1SI27G	N	Job makes you better companion at home
1595	A1SI27H	N	Job skills useful at home
1596	A1SI27I	N	Home responsibilities reduce job effort
1597	A1SI27J	N	Personal worries distract you at job
1598	A1SI27K	N	Home chores prevent sleep to do job
1599	A1SI27L	N	Home stress makes irritable at job
1600	A1SI27M	N	Talk someone at home helps job problems
1601	A1SI27N	N	Providing home makes work harder at job
1602	A1SI27O	N	Home love makes you confident at job
1603	A1SI27P	N	Home helps to relax for next workday
1604	A1SPOSWF	Y	Positive work to family spillover
1605	A1SNEGWF	Y	Negative work to family spillover
1606	A1SPOSFW	Y	Positive family to work spillover
1607	A1SNEGFW	Y	Negative family to work spillover
1608	A1SI28A	N	Work intensively at job
1609	A1SI28B	N	Learn new things at job
1610	A1SI28C	N	Work demands high skill level
1611	A1SI28D	N	Initiate things at job
1612	A1SI28E	N	Choice how to do work tasks
1613	A1SI28F	N	Choice what tasks to do at work
1614	A1SI28G	N	Say in work decisions
1615	A1SI28H	N	Say in planning work environment
1616	A1SI28I	N	Job provides variety interesting things
1617	A1SI28J	N	Work demands hard to combine
1618	A1SI29A	N	Too many demands at job (12 months)
1619	A1SI29B	N	Control amount of time at tasks at job (12 months)
1620	A1SI29C	N	Time to get everything done at job (12 months)
1621	A1SI29D	N	Lot of interruptions at job (12 months)
1622	A1SJCSD	N	Skill discretion (job characteristics)
1623	A1SJCDA	N	Decision authority (job characteristics)
1624	A1SJCDS	N	Demands scale (job characteristics)
1625	A1SJCCS	N	Coworker support (job characteristics)
1626	A1SJCSS	N	Supervisor support (job characteristics)
1627	A1SI30A	N	Coworker help/support
1628	A1SI30B	N	Coworker listen to work-related problems
1629	A1SI30C	N	Supervisor gives needed information
1630	A1SI30D	N	Supervisor help/support
1631	A1SI30E	N	Supervisor listen to work-related problems
1632	A1SI31A	N	Feel cheated about good job chances
1633	A1SI31B	N	Feel pride for work at job
1634	A1SI31C	N	Others respect my work at job
1635	A1SI31D	N	Others have more rewarding jobs
1636	A1SI31E	N	Had opportunities as good as others
1637	A1SI31F	N	Others have better jobs than me
1638	A1SPIWOR	Y	Perceived inequality in work
1639	A1SI32A	N	Too many demands at home (12 months)
1640	A1SI32B	N	Control amount of time at tasks at home (12 months)
1641	A1SI32C	N	Time to get everything done at home (12 months)
1642	A1SI32D	N	Lot of interruptions at home (12 months)
1643	A1SI33A	N	Feel pride about work at home
1644	A1SI33B	N	Feel others respect my work at home
1645	A1SI33C	N	Paid work more rewarding than home work
1646	A1SI34A	N	Feel pride about unpaid work in community
1647	A1SI34B	N	Feel others respect my community work
1648	A1SI34C	N	Paid work more rewarding than volunteer
1649	A1SJ1	N	Rate current financial situation
1650	A1SJ2	N	Rate financial situation 10 years ago
1651	A1SJ3	N	Rate financial situation 10 years future
1652	A1SJ4	N	Rate control over financial situation
1653	A1SJ5	N	Rate thought/effort into financial situation
1654	A1SJ6	N	Money to meet needs (more, enough, not enough)
1655	A1SJ7	N	How difficult to pay monthly bills
1656	A1SJ8	N	Respondent's wages last calendar year
1657	A1SJ8M	N	Mean respondent's wages last calendar year
1658	A1SJ9	N	Spouse/partner's wages last calendar year
1659	A1SJ9M	N	Mean spouse/partner's wages last calendar year
1660	A1SHWEARN	N	Respondent's and spouse/partner's earnings
1661	A1SJ10	N	Other family member's wages last calendar year
1662	A1SJ10M	N	Mean other family member's wages last calendar year
1663	A1SJ11	N	Household income from social security (12 months)
1664	A1SJ11M	N	Mean household income from social security (12 months)
1665	A1SJ12	N	Total household income from government assistance (12 months)
1666	A1SJ12M	N	Mean total household income from government assistance (12 months)
1667	A1SJ13	N	Household all other income (12 months)
1668	A1SJ13M	N	Mean household all other income (12 months)
1669	A1SHHTOT	N	Household total income from wage, pension, social security, and other sources
1670	A1SJ14	N	Money left or owed if cashed in and paid off debt
1671	A1SJ15	N	Amount you would owe or have
1672	A1SASSET	N	Assets in $100
1673	A1SJ16	N	Respondent employer/union pension plan currently
1674	A1SJ17	N	Respondent has own traditional/Keogh/Roth IRA account
1675	A1SJ18	N	Respondent has other pension/retirement plans
1676	A1SJ19	N	Spouse/partner employer/union pension plan currently
1677	A1SK1	N	Rate current contribution to others welfare
1678	A1SK2	N	Rate contribution to others welfare 10 years ago
1679	A1SK3	N	Rate contribution to others welfare 10 years future
1680	A1SK4	N	Rate control over contribution to others welfare
1681	A1SK5	N	Rate thought/effort into contribution to others welfare
1682	A1SK6A	N	Made unique contributions to society
1683	A1SK6B	N	Important skills to pass along to others
1684	A1SK6C	N	Many people come to you for advice
1685	A1SK6D	N	Feel other people need you
1686	A1SK6E	N	Good influence on others' lives
1687	A1SK6F	N	Like to teach things to people
1688	A1SGENER	Y	Loyola generativity scale
1689	A1SK7A	N	Drop plan when children troubled
1690	A1SK7B	N	Contact adult children regularly
1691	A1SK7C	N	Raise children for friend if died
1692	A1SK7D	N	Drop plan when spouse troubled
1693	A1SK7E	N	Take adult children back into home
1694	A1SK7F	N	Take friend into home
1695	A1SK7G	N	Call parents regularly
1696	A1SK7H	N	Give money to friend
1697	A1SK7I	N	Serve on a jury if called
1698	A1SK7J	N	Keep informed about national news
1699	A1SK7K	N	Testify in court for accident
1700	A1SK7L	N	Vote in local/national election
1701	A1SK7M	N	Do more than others on job
1702	A1SK7N	N	Work hard even if dislike employer
1703	A1SK7O	N	Cancel visit friend to work overtime
1704	A1SK7P	N	Pay more so everyone had healthcare
1705	A1SK7Q	N	Volunteer for social causes
1706	A1SK7R	N	Collect contributions for medical research
1707	A1SK7S	N	Vote for law help others but increase my tax
1708	A1SPRIOB	Y	Primary obligation - 3 factor model
1709	A1SCVOB3	Y	Civic and job obligation - 3 factor model
1710	A1SCVOB5	Y	Civic obligation - 5 factor model
1711	A1SWKOB	Y	Work obligation - 5 factor model
1712	A1SALTRU	Y	Altruism obligation - 3 factor model
1713	A1SK8A	N	Volunteer hospital/nursing home (hours/month)
1714	A1SK8B	N	Volunteer school/other youth related work (hours/month)
1715	A1SK8C	N	Volunteer political organization/causes (hours/month)
1716	A1SK8D	N	Volunteer other organization/causes (hours/month)
1717	A1SK9A	N	Attend religious service (numbers/month)
1718	A1SK9B	N	Attend religious meeting (numbers/month)
1719	A1SK9C	N	Attend meeting unions/professional groups (numbers/month)
1720	A1SK9D	N	Attend meeting sports/social groups (numbers/month)
1721	A1SK9E	N	Attend meeting other groups (numbers/month)
1722	A1SK10A	N	Give spouse/partner emotional support (hours/month)
1723	A1SK10B	N	Give parents emotional support (hours/month)
1724	A1SK10C	N	Give in-laws emotional support (hours/month)
1725	A1SK10D	N	Give children emotional support (hours/month)
1726	A1SK10E	N	Give other family/friends emotional support (hours/month)
1727	A1SK10F	N	Give anyone else emotional support (hours/month)
1728	A1SPSUPE	Y	Monthly hours give support/advice
1729	A1SK11A	N	Receive emotional support spouse/partner (hours/month)
1730	A1SK11B	N	Receive emotional support parents (hours/month)
1731	A1SK11C	N	Receive emotional support in-laws (hours/month)
1732	A1SK11D	N	Receive emotional support children (hours/month)
1733	A1SK11E	N	Receive emotional support other family/friends (hours/month)
1734	A1SK11F	N	Receive emotional support anyone else (hours/month)
1735	A1SRSUPE	Y	Monthly hours receive support/advice
1736	A1SK12A	N	Give unpaid assistance parents (hours/month)
1737	A1SK12B	N	Give unpaid assistance in-laws (hours/month)
1738	A1SK12C	N	Give unpaid assistance children (hours/month)
1739	A1SK12D	N	Give unpaid assistance other family/friends (hours/month)
1740	A1SK12E	N	Give unpaid assistance anyone else (hours/month)
1741	A1SPSUPI	Y	Monthly hours give assistance family/friends
1742	A1SK13A	N	Receive unpaid assistance parents (hours/month)
1743	A1SK13B	N	Receive unpaid assistance in-laws (hours/month)
1744	A1SK13C	N	Receive unpaid assistance children (hours/month)
1745	A1SK13D	N	Receive unpaid assistance other family/friends (hours/month)
1746	A1SK13E	N	Receive unpaid assistance community volunteers (hours/month)
1747	A1SK13F	N	Receive unpaid assistance religious groups (hours/month)
1748	A1SK13G	N	Receive unpaid assistance other organization (hours/month)
1749	A1SK13H	N	Receive unpaid assistance government groups (hours/month)
1750	A1SRSUIF	Y	Monthly hours receive assistance family/friends
1751	A1SRSUIO	Y	Monthly hours receive assistance non-family/friends
1752	A1SK14A	N	Financial support to parents (dollars/month)
1753	A1SK14B	N	Financial support to in-laws (dollars/month)
1754	A1SK14C	N	Financial support to children (dollars/month)
1755	A1SK14D	N	Financial support to other family/friends (dollars/month)
1756	A1SK14E	N	Financial support to any other individuals (dollars/month)
1757	A1SK14F	N	Financial support to religious groups (dollars/month)
1758	A1SK14G	N	Financial support to political organizations (dollars/month)
1759	A1SK14H	N	Financial support to other organizations (dollars/month)
1760	A1SK15A	N	Financial support from parents (dollars/month)
1761	A1SK15B	N	Financial support from in-laws (dollars/month)
1762	A1SK15C	N	Financial support from children (dollars/month)
1763	A1SK15D	N	Financial support from other family/friends (dollars/month)
1764	A1SK15E	N	Financial support from religious groups (dollars/month)
1765	A1SK15F	N	Financial support from other non-governmental organizations (dollars/month)
1766	A1SK15G	N	Financial support from any government group (dollars/month)
1767	A1SK16A	N	Lived with aging parent (12 months)
1768	A1SK16B	N	Lived with adult children (12 months)
1769	A1SK16C	N	Lived with grandchildren (12 months)
1770	A1SK16D	N	Lived with other friends/family (12 months)
1771	A1SK17A	N	World is too complex for me
1772	A1SK17B	N	Do not feel I belong to community
1773	A1SK17C	N	People who do a favor expect nothing
1774	A1SK17D	N	Have something valuable to give world
1775	A1SK17E	N	World is becoming better place
1776	A1SK17F	N	Feel close to others in community
1777	A1SK17G	N	Daily activities not worthwhile for community
1778	A1SK17H	N	Cannot make sense of world
1779	A1SK17I	N	Society stopped making progress
1780	A1SK17J	N	People do not care about others problems
1781	A1SK17K	N	Community is source of comfort
1782	A1SK17L	N	Easy to predict society future
1783	A1SK17M	N	Society not improving for people like me
1784	A1SK17N	N	Believe people are kind
1785	A1SK17O	N	Have nothing important for society
1786	A1SSWBMS	Y	Meaningfulness of society (social well-being)
1787	A1SSWBSI	Y	Social integration (social well-being)
1788	A1SSWBAO	Y	Acceptance of others (social well-being)
1789	A1SSWBSC	Y	Social contribution (social well-being)
1790	A1SSWBSA	Y	Social actualization (social well-being)
1791	A1SL1	N	Contact with neighbors (frequency)
1792	A1SL2	N	Conversation/get together with neighbor (frequency)
1793	A1SL3	N	Years lived in current neighborhood
1794	A1SL4	N	Own home outright, mortgage, or rent
1795	A1SL5A	N	Safe alone in neighborhood daytime
1796	A1SL5B	N	Safe alone in neighborhood at night
1797	A1SL5C	N	Home as nice as most people
1798	A1SL5D	N	Proud of my home
1799	A1SL5E	N	Can call neighbor for help if needed
1800	A1SL5F	N	Others live in better neighborhood
1801	A1SL5G	N	Neighbors trust each other
1802	A1SL5H	N	Do not like to invite others to home
1803	A1SL5I	N	Buildings/streets kept in good repair
1804	A1SL5J	N	Feel good about home/neighborhood
1805	A1SL5K	N	Neighborhood is kept clean
1806	A1SL5L	N	Hopeless to improve home/neighborhood
1807	A1SHOMET	Y	Perceived quality of neighborhood
1808	A1SPIHOM	Y	Perceived inequality in home
1809	A1SM1	N	Contact with family members (frequency)
1810	A1SM2	N	Family members really care about you
1811	A1SM3	N	Family members understand way you feel
1812	A1SM4	N	Rely on family for help with problem
1813	A1SM5	N	Open up to family about worries
1814	A1SM6	N	Family members make too many demands
1815	A1SM7	N	Family members criticize you
1816	A1SM8	N	Family members let you down
1817	A1SM9	N	Family members get on your nerves
1818	A1SFAMSO	N	Family Affectual Solidarity
1819	A1SKINPO	Y	Support from family
1820	A1SKINNE	Y	Strain from family
1821	A1SM10	N	Contact with friends (frequency)
1822	A1SM11	N	Friends really care about you
1823	A1SM12	N	Friends understand way you feel
1824	A1SM13	N	Rely on friends for help with problem
1825	A1SM14	N	Open up to friends about worries
1826	A1SFDSOL	Y	Friendship affectual solidarity
1827	A1SM15	N	Friends make too many demands on you
1828	A1SM16	N	Friends criticize you
1829	A1SM17	N	Friends let you down
1830	A1SM18	N	Friends get on your nerves
1831	A1SFDSPO	Y	Support from Friends
1832	A1SFDSNE	Y	Strain from Friends
1833	A1SM19	N	Friends/relative asks for advice/help
1834	A1SM20	N	You ask friend/relative for advice/help
1835	A1SM21A1	N	Spouse/partner chronic disease/disability (12 months)
1836	A1SM21A2	N	Parents chronic disease/disability (12 months)
1837	A1SM21A3	N	Children chronic disease/disability (12 months)
1838	A1SM21B1	N	Spouse/partner frequent minor illnesses (12 months)
1839	A1SM21B2	N	Parents frequent minor illnesses (12 months)
1840	A1SM21B3	N	Children frequent minor illnesses (12 months)
1841	A1SM21C1	N	Spouse/partner emotional problems (12 months)
1842	A1SM21C2	N	Parents emotional problems (12 months)
1843	A1SM21C3	N	Children emotional problems (12 months)
1844	A1SM21D1	N	Spouse/partner alcohol/substance problems (12 months)
1845	A1SM21D2	N	Parents alcohol/substance problems (12 months)
1846	A1SM21D3	N	Children alcohol/substance problems (12 months)
1847	A1SM21E1	N	Spouse/partner financial problems (12 months)
1848	A1SM21E2	N	Parents financial problems (12 months)
1849	A1SM21E3	N	Children financial problems (12 months)
1850	A1SM21F1	N	Spouse/partner school/work problems (12 months)
1851	A1SM21F2	N	Parents school/work problems (12 months)
1852	A1SM21F3	N	Children school/work problems (12 months)
1853	A1SM21G1	N	Spouse/partner difficult find/keep job (12 months)
1854	A1SM21G2	N	Parents difficult find/keep job (12 months)
1855	A1SM21G3	N	Children difficult find/keep job (12 months)
1856	A1SM21H1	N	Spouse/partner marital/relationship problems (12 months)
1857	A1SM21H2	N	Parents marital/relationship problems (12 months)
1858	A1SM21H3	N	Children marital/relationship problems (12 months)
1859	A1SM21I1	N	Spouse/partner legal problems (12 months)
1860	A1SM21I2	N	Parents legal problems (12 months)
1861	A1SM21I3	N	Children legal problems (12 months)
1862	A1SM21J1	N	Spouse/partner difficult get along with others (12 months)
1863	A1SM21J2	N	Parents difficult get along with others (12 months)
1864	A1SM21J3	N	Children difficult get along with others (12 months)
1865	A1SN1	N	Rate current relationship with children
1866	A1SN2	N	Rate relationship with children 10 years ago
1867	A1SN3	N	Rate relationship with children 10 years future
1868	A1SN4	N	Rate control over relationship with children
1869	A1SN5	N	Rate thought/effort relationship with children
1870	A1SN6A	N	Feel good about opportunities for children
1871	A1SN6B	N	Family life with children more negative
1872	A1SN6C	N	Problems with children caused shame
1873	A1SN6D	N	No resources for fun things with children
1874	A1SN6E	N	Do for children as much as others
1875	A1SN6F	N	Pride about what able to do for children
1876	A1SPIFAM	Y	Perceived Inequality in Family
1877	A1SN7A1		Respondent stop working to care for children
1878	A1SN7A2		Spouse/partner stop working to care for children
1879	A1SN7B1		Respondent cut back hours to care for children
1880	A1SN7B2		Spouse/partner cut back hours to care for children
1881	A1SN7C1		Respondent work longer hours meet child needs
1882	A1SN7C2		Spouse/partner work longer hours meet child needs
1883	A1SN7D1		Respondent switch to different job for children
1884	A1SN7D2		Spouse/partner switch to different job for children
1885	A1SN8		Days respondent change schedule for childcare
1886	A1SN9		Days spouse/partner change schedule for childcare
1887	A1SN10		Provide childcare stressful (school year)
1888	A1SN11		Provide childcare stressful (summer)
1889	A1SP1	N	Rate current marriage/relationship
1890	A1SP2		Rate marriage/relationship 10 years ago
1891	A1SP3	N	Rate marriage/relationship 10 years future
1892	A1SP4		Rate control over marriage/relationship
1893	A1SP5	N	Rate thought/effort marriage/relationship
1894	A1SP6		Describe marital relationship
1895	A1SP7	N	Relationship in trouble (12 months)
1896	A1SP8	N	Chances eventually separate from spouse/partner
1897	A1SP9A	N	Disagree about money matters with spouse/partner
1898	A1SP9B	N	Disagree about household tasks with spouse/partner
1899	A1SP9C	N	Disagree about leisure activities with spouse/partner
1900	A1SSPDIS	Y	Spouse/partner disagreement
1901	A1SMARRS	Y	Marital risk
1902	A1SP10	N	Good talk with spouse/partner (frequency)
1903	A1SP11	N	Spouse/partner really cares about you
1904	A1SP12	N	Spouse/partner understands way you feel
1905	A1SP13	N	Spouse/partner appreciates you
1906	A1SP14	N	Rely spouse/partner for help with serious problem
1907	A1SP15	N	Open up to spouse/partner about worries
1908	A1SP16	N	Can relax, be yourself around spouse/partner
1909	A1SSPSOL	Y	Spouse/partner affectual solidarity
1910	A1SSPEMP	Y	Support from spouse/partner
1911	A1SP17	N	Spouse/partner makes too many demands on you
1912	A1SP18	N	Spouse/partner makes you feel tense
1913	A1SP19	N	Spouse/partner argues with you
1914	A1SP20	N	Spouse/partner criticizes you
1915	A1SP21	N	Spouse/partner lets you down
1916	A1SP22	N	Spouse/partner gets on your nerves
1917	A1SSPCRI	Y	Strain from spouse/partner
1918	A1SP23	N	Who does more household chores
1919	A1SP24	N	Respondent does household chores (hours/week)
1920	A1SP25	N	Spouse/partner does household chores (hours/week)
1921	A1SP26	N	How fair are household chores to respondent
1922	A1SP27	N	How fair are household chores to spouse/partner
1923	A1SP28A	N	Make decisions with spouse/partner as a team
1924	A1SP28B	N	Talk with spouse/partner makes things better
1925	A1SP28C	N	Talk with spouse/partner before make plans
1926	A1SP28D	N	Ask spouse/partner for advice about issues
1927	A1SSPDEC	Y	Spouse/partner decision making
1928	A1SP29	N	Describe spouse/partner physical health currently
1929	A1SP30	N	Describe spouse/partner mental health currently
1930	A1SP31	N	Spouse/partner currently working for pay, either full-time or part-time?
1931	A1SP32	N	Hours per week spouse/partner works at main job
1932	A1SP33	N	Hours per week spouse/partner works at other job
1933	A1SP34A	N	Spouse/partner works days in average week (frequency)
1934	A1SP34B	N	Spouse/partner works evenings in average week (frequency)
1935	A1SP34C	N	Spouse/partner works nights in average week (frequency)
1936	A1SP34D	N	Spouse/partner works weekends in average week (frequency)
1937	A1SP35	N	Spouse/partner time begin job - military time (HHMM)
1938	A1SP36	N	Spouse/partner time end job - military time (HHMM)
1939	A1SP37	N	Spouse/partner job commute time - number of minutes
1940	A1SP38	N	Spouse/partner chances could keep job for next 2 years
1941	A1SQ1	N	Rate sexual aspect of life currently
1942	A1SQ2	N	Rate sexual aspect of life 10 years ago
1943	A1SQ3	N	Rate sexual aspect of life 10 years future
1944	A1SQ4	N	Rate control over sexual aspect of life
1945	A1SQ5	N	Rate thought/effort sexual aspect of life
1946	A1SQ6	N	Number of sex partners (past year)
1947	A1SQ7	N	Describe sexual orientation
1948	A1SQ8	N	Sex frequency (past 6 months)
1949	A1SR1	N	Religious preference 1st choice
1950	A1SR1A	N	Christian religion
1951	A1SR2A	N	How religious are you
1952	A1SR2B	N	How spiritual are you
1953	A1SR2C	N	How superstitious are you
1954	A1SR2D	N	Religion important in your life
1955	A1SR2E	N	Spirituality important in your life
1956	A1SR2F	N	Religious instruction important for children
1957	A1SR2G	N	Identify with your religious group
1958	A1SR2H	N	Prefer people of same religion
1959	A1SR2I	N	Important to marry in same religion
1960	A1SR3	N	Explore different religions or stick to one
1961	A1SR4	N	Attend religious/spiritual services (frequency)
1962	A1SR5	N	Seek comfort through religion when problem
1963	A1SR6	N	Look to religious beliefs make decisions
1964	A1SR7	N	Ever been born again
1965	A1SR8	N	Bible is actual word of God
1966	A1SA1S1_1		American Indian/Native American
1967	A1SA1S1_2		Bahamas
1968	A1SA1S1_3		Canada
1969	A1SA1S1_4		Costa Rica
1970	A1SA1S1_5		Cuba
1971	A1SA1S1_6		Dominican Republic
1972	A1SA1S1_7		El Salvador
1973	A1SA1S1_8		Guatemala
1974	A1SA1S1_9		Haiti
1975	A1SA1S1_10		Honduras
1976	A1SA1S1_11		Jamaica
1977	A1SA1S1_12		Mexico
1978	A1SA1S1_13		Nicaragua
1979	A1SA1S1_14		Panama
1980	A1SA1S1_15		Puerto Rico
1981	A1SA1S1_16		St. Vincent
1982	A1SA1S1_17		Trinidad
1983	A1SA1S1_18		Central America/Caribbean
1984	A1SA1S1_19		North/Central America/Other
1985	A1SA1S1_20		Argentina
1986	A1SA1S1_21		Bolivia
1987	A1SA1S1_22		Brazil
1988	A1SA1S1_23		Chile
1989	A1SA1S1_24		Colombia
1990	A1SA1S1_25		Ecuador
1991	A1SA1S1_26		Peru
1992	A1SA1S1_27		Venezuela
1993	A1SA1S1_28		South America-no specific country
1994	A1SA1S1_29		South America/other
1995	A1SA1S1_30		Czechoslovakia
1996	A1SA1S1_31		England
1997	A1SA1S1_32		France
1998	A1SA1S1_33		Germany
1999	A1SA1S1_34		Greece
[truncated: 98 more rows]

## Sheet: Round 1
Target	Relevant	Non-modifiable	Composite	Description
B1SPWBR1	A1PA55	Y	N	When drank most, number of drinks when drank
B1SPWBR1	A1POCC	Y	N	Respondent current occupation
B1SPWBR1	A1PTEDU	Y	N	Respondent current - logit all education some college
B1SPWBR1	A1PSSXEDAG	Y	Y	Spouse/partner sex/education/age category
B1SPWBR1	A1SSATIS	N	Y	Life Satisfaction (5-item version)
B1SPWBR1	A1SNEGAF	N	Y	Negative affect
B1SPWBR1	A1SPOSAF	N	Y	Positive affect
B1SPWBR1	A1SEMA	Y	Y	Maternal affection
B1SPWBR1	A1SEFA	Y	Y	Paternal affection
B1SPWBR1	A1SEMAPA	Y	Y	Parental affection
B1SPWBR1	A1SF1B	N	N	Pleased with how life turned out
B1SPWBR1	A1SF1C	N	N	Some wander aimlessly, but not me
B1SPWBR1	A1SF1T	N	N	Helpless dealing with problems of life
B1SPWBR1	A1SF1CC	N	N	Feel pushed around in life
B1SPWBR1	A1SCTRL	N	Y	Sense of control (mastery + constraints)
B1SPWBR1	A1SPWBU	Y	Y	Purpose in life (psychological well-being 3-item)
B1SPWBR1	A1SPWBS	Y	Y	Self-acceptance (psychological well-being 3-item)
B1SPWBR1	A1SCONST	N	Y	Perceived constraints
B1SPWBR1	A1SSUFFI	N	Y	Self-sufficiency
B1SPWBR1	A1SF4A	N	N	Outgoing describes you how well
B1SPWBR1	A1SF4B	N	N	Helpful describes you how well
B1SPWBR1	A1SF4G	N	N	Warm describes you how well
B1SPWBR1	A1SF4Z	N	N	Sympathetic describes you how well
B1SPWBR1	A1SAGREE	N	Y	Agreeableness personality trait
B1SPWBR1	A1SEXTRA	N	Y	Extraversion personality trait
B1SPWBR1	A1SNEURO	N	Y	Neuroticism personality trait
B1SPWBR1	A1SF5J	N	N	How caring now
B1SPWBR1	A1SPSUPE	N	Y	Monthly hours give support/advice
B1SPWBR1	A1SRSUPE	N	Y	Monthly hours receive support/advice
B1SPWBR1	A1SPSUPI	N	Y	Monthly hours give assistance family/friends
B1SPWBR1	A1SK14C	N	N	Financial support to children (dollars/month)
B1SPWBR1	A1SK17B	N	N	Do not feel I belong to community
B1SPWBR1	A1SK17G	N	N	Daily activities not worthwhile for community
B1SPWBR1	A1SSWBSI	N	Y	Social integration (social well-being)
B1SPWBR1	A1SSWBAO	N	Y	Acceptance of others (social well-being)
B1SPWBR1	A1SSWBSC	N	Y	Social contribution (social well-being)
B1SPWBR1	A1SL5H	N	N	Do not like to invite others to home
B1SPWBR1	A1SPIHOM	N	Y	Perceived inequality in home
B1SPWBR1	A1SM3	N	N	Family members understand way you feel
B1SPWBR1	A1SM5	N	N	Open up to family about worries
B1SPWBR1	A1SFAMSO	N	N	Family Affectual Solidarity
B1SPWBR1	A1SKINPO	N	Y	Support from family
B1SPWBR1	A1SM11	N	N	Friends really care about you
B1SPWBR1	A1SM13	N	N	Rely on friends for help with problem
B1SPWBR1	A1SFDSOL	N	Y	Friendship affectual solidarity
B1SPWBR1	A1SFDSPO	N	Y	Support from Friends
B1SPWBR1	A1SPIFAM	Y	Y	Perceived Inequality in Family
B1SPWBR1	A1SP8	Y	N	Chances eventually separate from spouse/partner
B1SPWBR1	A1SMARRS	N	Y	Marital risk
B1SPWBR1	A1SSPSOL	N	Y	Spouse/partner affectual solidarity
B1SPWBR1	A1ST1	N	N	Rate life overall currently
B1SPWBS1	A1PB1	Y	N	Highest level of education completed
B1SPWBS1	A1POCCS	Y	N	Spouse/Partner occupation
B1SPWBS1	A1PD1	N	N	Satisfied with life at present
B1SPWBS1	A1PD3	N	N	Satisfied with self at present
B1SPWBS1	A1PD9	N	N	Disappointed by achievement (agree, disagree)
B1SPWBS1	A1PD9A	N	N	Disappointed by achievement (agree/disagree level)
B1SPWBS1	A1SSATIS	N	Y	Life Satisfaction (5-item version)
B1SPWBS1	A1SA13F	N	N	Felt worthless frequency (30 days)
B1SPWBS1	A1SNEGAF	N	Y	Negative affect
B1SPWBS1	A1SA15B	N	N	Felt good spirits frequency (30 days)
B1SPWBS1	A1SA15E	N	N	Felt satisfied frequency (30 days)
B1SPWBS1	A1SPOSAF	N	Y	Positive affect
B1SPWBS1	A1SEFA	Y	Y	Paternal affection
B1SPWBS1	A1SEMAPA	Y	Y	Parental affection
B1SPWBS1	A1SF1C	N	N	Some wander aimlessly, but not me
B1SPWBS1	A1SF1F	N	N	Maintaining close relationships difficult
B1SPWBS1	A1SF1K	N	N	Life process of learning/changing/growth
B1SPWBS1	A1SF1T	N	N	Helpless dealing with problems of life
B1SPWBS1	A1SF1U	N	N	Do just about anything I set my mind to
B1SPWBS1	A1SCTRL	N	Y	Sense of control (mastery + constraints)
B1SPWBS1	A1SPWBE	N	Y	Environmental mastery (psychological well-being 3-item)
B1SPWBS1	A1SPWBR	N	Y	Positive relations with others (psychological well-being 3-item)
B1SPWBS1	A1SCONST	N	Y	Perceived constraints
B1SPWBS1	A1SF4E	N	N	Self-confident describes you how well
B1SPWBS1	A1SAGENC	N	Y	Agency personality trait
B1SPWBS1	A1SNEURO	N	Y	Neuroticism personality trait
B1SPWBS1	A1SI3	N	N	Rate work situation 10 years ago
B1SPWBS1	A1SPIWOR	Y	Y	Perceived inequality in work
B1SPWBS1	A1SJ1	Y	N	Rate current financial situation
B1SPWBS1	A1SGENER	N	Y	Loyola generativity scale
B1SPWBS1	A1SSWBSC	N	Y	Social contribution (social well-being)
B1SPWBS1	A1SPIHOM	Y	Y	Perceived inequality in home
B1SPWBS1	A1SFAMSO	N	N	Family Affectual Solidarity
B1SPWBS1	A1SKINNE	N	Y	Strain from family
B1SPWBS1	A1SN6A	Y	N	Feel good about opportunities for children
B1SPWBS1	A1SPIFAM	Y	Y	Perceived Inequality in Family
B1SPWBS1	A1ST1	N	N	Rate life overall currently
B1SPWBS1	A1ST2	N	N	Rate life overall 10 years ago
B1SPWBA1	A1SNEGAF	N	Y	Negative affect
B1SPWBA1	A1SA15D	N	N	Felt calm and peaceful frequency (30 days)
B1SPWBA1	A1SF1T	N	N	Helpless dealing with problems of life
B1SPWBA1	A1SF1V	N	N	Others determine what I can and cannot do
B1SPWBA1	A1SF1Y	N	N	Many things interfere with what I want do
B1SPWBA1	A1SF1CC	N	N	Feel pushed around in life
B1SPWBA1	A1SCTRL	N	Y	Sense of control (mastery + constraints)
B1SPWBA1	A1SPWBE	N	Y	Environmental mastery (psychological well-being 3-item)
B1SPWBA1	A1SCONST	N	Y	Perceived constraints
B1SPWBA1	A1SF3D	N	N	To avoid disappointments, don't set goals too high
B1SPWBA1	A1SPERSI	N	Y	Persist in goal striving (primary control)
B1SPWBA1	A1SREAPP	N	Y	Positive reappraisal (secondary control)
B1SPWBA1	A1SF4E	N	N	Self-confident describes you how well
B1SPWBA1	A1SAGENC	N	Y	Agency personality trait
B1SPWBA1	A1SNEURO	N	Y	Neuroticism personality trait
B1SPWBA1	A1SOPEN	N	Y	Openness personality trait
B1SPWBA1	A1SF5E	Y	N	How willing to learn 10 years ago
B1SPWBA1	A1SNEGFW	N	Y	Negative family to work spillover
B1SPWBA1	A1SSWBMS	N	Y	Meaningfulness of society (social well-being)
B1SPWBA1	A1SSWBSA	N	Y	Social actualization (social well-being)
B1SPWBA1	A1SFDSOL	N	Y	Friendship affectual solidarity
B1SPWBA1	A1SSPSOL	N	Y	Spouse/partner affectual solidarity
B1SPWBA1	A1SR2C	N	N	How superstitious are you
B1SPWBG1	A1PA52	Y	N	Age had first drink of alcohol
B1SPWBG1	A1PB1	Y	N	Highest level of education completed
B1SPWBG1	A1PSXEDAG	Y	N	Sex/education/age category of R
B1SPWBG1	A1SWSTHI	Y	N	Waist-to-hip ratio
B1SPWBG1	A1SF1M	N	N	Others describe me as giving/share time
B1SPWBG1	A1SF1P	N	N	No experience warm and trusting relationships
B1SPWBG1	A1SF1S	N	N	Little can do to change important things
B1SPWBG1	A1SF1T	N	N	Helpless dealing with problems of life
B1SPWBG1	A1SF1BB	N	N	Really no way I can solve problems I have
B1SPWBG1	A1SCTRL	N	Y	Sense of control (mastery + constraints)
B1SPWBG1	A1SPWBR	N	Y	Positive relations with others (psychological well-being 3-item)
B1SPWBG1	A1SPWBU	N	Y	Purpose in life (psychological well-being 3-item)
B1SPWBG1	A1SPWBS	N	Y	Self-acceptance (psychological well-being 3-item)
B1SPWBG1	A1SCONST	N	Y	Perceived constraints
B1SPWBG1	A1SF3E	N	N	Learn meaningful from difficult situation
B1SPWBG1	A1SPERSI	N	Y	Persist in goal striving (primary control)
B1SPWBG1	A1SREAPP	N	Y	Positive reappraisal (secondary control)
B1SPWBG1	A1SDIREC	N	Y	Self-directedness and planning
B1SPWBG1	A1SF4B	N	N	Helpful describes you how well
B1SPWBG1	A1SF4E	N	N	Self-confident describes you how well
B1SPWBG1	A1SEXTRA	N	Y	Extraversion personality trait
B1SPWBG1	A1SCONS	N	Y	Conscientiousness personality trait
B1SPWBG1	A1SOPEN	N	Y	Openness personality trait
B1SPWBG1	A1SF5D	N	N	How willing to learn now
B1SPWBG1	A1SF5F	N	N	How willing to learn 10 years ahead
B1SPWBG1	A1SF5I	N	N	How energetic 10 years ahead
B1SPWBG1	A1SJ4	N	N	Rate control over financial situation
B1SPWBG1	A1SK3	N	N	Rate contribution to others welfare 10 years future
B1SPWBG1	A1SGENER	N	Y	Loyola generativity scale
B1SPWBG1	A1SCVOB5	N	Y	Civic obligation - 5 factor model
B1SPWBG1	A1SALTRU	N	Y	Altruism obligation - 3 factor model
B1SPWBG1	A1SPSUPE	N	Y	Monthly hours give support/advice
B1SPWBG1	A1SK17O	N	N	Have nothing important for society
B1SPWBG1	A1SSWBMS	N	Y	Meaningfulness of society (social well-being)
B1SPWBG1	A1SSWBSC	N	Y	Social contribution (social well-being)
B1SPWBG1	A1SSWBSA	N	Y	Social actualization (social well-being)
B1SPWBG1	A1SPIHOM	N	Y	Perceived inequality in home
B1SPWBE1	A1PAGE_M2	Y	N	Respondent's calculated age at MIDUS 1 Project 1 phone interview
B1SPWBE1	A1PRAGE_2019	Y	N	Respondent's calculated age at MIDUS 1 Project 1 phone interview, updated
B1SPWBE1	A1PA10	Y	N	Mental health at 16
B1SPWBE1	A1PB18YR	Y	N	Year married (first marriage)
B1SPWBE1	A1PSAGE	Y	N	Age of spouse/partner
B1SPWBE1	A1PD3	N	N	Satisfied with self at present
B1SPWBE1	A1SSATIS	N	Y	Life Satisfaction (5-item version)
B1SPWBE1	A1SNEGAF	N	Y	Negative affect
B1SPWBE1	A1SPOSAF	N	Y	Positive affect
B1SPWBE1	A1SF1B	N	N	Pleased with how life turned out
B1SPWBE1	A1SF1E	N	N	Disappointed about achievements in life
B1SPWBE1	A1SF1T	N	N	Helpless dealing with problems of life
B1SPWBE1	A1SF1CC	N	N	Feel pushed around in life
B1SPWBE1	A1SCTRL	N	Y	Sense of control (mastery + constraints)
B1SPWBE1	A1SPWBS	N	Y	Self-acceptance (psychological well-being 3-item)
B1SPWBE1	A1SCONST	N	Y	Perceived constraints
B1SPWBE1	A1SPERSI	N	Y	Persist in goal striving (primary control)
B1SPWBE1	A1SAGENC	N	Y	Agency personality trait
B1SPWBE1	A1SNEURO	N	Y	Neuroticism personality trait
B1SPWBE1	A1SCONS	N	Y	Conscientiousness personality trait
B1SPWBE1	A1SF5G	N	N	How energetic now
B1SPWBE1	A1SF5H	Y	N	How energetic 10 years ago
B1SPWBE1	A1SI3	N	N	Rate work situation 10 years ago
B1SPWBE1	A1SI8	N	N	Number of years employed at least 6 months of year
B1SPWBE1	A1SNEGFW	N	Y	Negative family to work spillover
B1SPWBE1	A1SJ1	Y	N	Rate current financial situation
B1SPWBE1	A1SSWBMS	N	Y	Meaningfulness of society (social well-being)
B1SPWBE1	A1SSWBSA	N	Y	Social actualization (social well-being)
B1SPWBE1	A1SL5K	Y	N	Neighborhood is kept clean
B1SPWBE1	A1SPIHOM	N	Y	Perceived inequality in home
B1SPWBE1	A1SFAMSO	N	N	Family Affectual Solidarity
B1SPWBE1	A1SSPSOL	N	Y	Spouse/partner affectual solidarity
B1SPWBE1	A1SSPCRI	N	Y	Strain from spouse/partner
B1SPWBE1	A1ST1	N	N	Rate life overall currently
B1SPWBE1	A1ST4	N	N	Rate control over life
B1SPWBU1	A1PAGE_M2	Y	N	Respondent's calculated age at MIDUS 1 Project 1 phone interview
B1SPWBU1	A1PRAGE_2019	Y	N	Respondent's calculated age at MIDUS 1 Project 1 phone interview, updated
B1SPWBU1	A1PBYEAR	Y	N	Respondent's birth year at MIDUS 1 Project 1 phone interview
B1SPWBU1	A1PBYEAR_2019	Y	N	Respondent's birth year at MIDUS 1 Project 1 phone interview, updated as
B1SPWBU1	A1PA4	Y	N	Physical health self-evaluated
B1SPWBU1	A1PA5	N	N	Mental/emotional health self-evaluated
B1SPWBU1	A1PB1	Y	N	Highest level of education completed
B1SPWBU1	A1PB18YR	Y	N	Year married (first marriage)
B1SPWBU1	A1SHLOCO	N	Y	Health locus of control - Others
B1SPWBU1	A1SF1E	N	N	Disappointed about achievements in life
B1SPWBU1	A1SF1N	N	N	Gave up try making improvements long ago
B1SPWBU1	A1SF1T	N	N	Helpless dealing with problems of life
B1SPWBU1	A1SF1AA	N	N	Little control over things happen to me
B1SPWBU1	A1SCTRL	N	Y	Sense of control (mastery + constraints)
B1SPWBU1	A1SPWBG	N	Y	Personal growth (psychological well-being 3-item)
B1SPWBU1	A1SCONST	N	Y	Perceived constraints
B1SPWBU1	A1SF3Q	N	N	I live one day at a time
B1SPWBU1	A1SDIREC	N	Y	Self-directedness and planning
B1SPWBU1	A1STODAY	N	Y	Live for today
B1SPWBU1	A1SCONS	N	Y	Conscientiousness personality trait
B1SPWBU1	A1SG2C	Y	N	Rate physical health in late 60s
B1SPWBU1	A1SG3	Y	N	Age feel like most of the time
B1SPWBU1	A1SG4	N	N	Age would like to be
B1SPWBU1	A1SI1K1	Y	N	Retired 10 years ago
B1SPWBU1	A1SI13A	Y	N	Work paid number of weeks (12 months)
B1SPWBU1	A1SI27M	N	N	Talk someone at home helps job problems
B1SPWBU1	A1SHWEARN	Y	N	Respondent's and spouse/partner's earnings
B1SPWBU1	A1SHHTOT	Y	N	Household total income from wage, pension, social security, and other sources
B1SPWBU1	A1SJ15	Y	N	Amount you would owe or have
B1SPWBU1	A1SPSUPE	N	Y	Monthly hours give support/advice
B1SPWBU1	A1SK17O	N	N	Have nothing important for society
B1SPWBU1	A1SSWBSC	N	Y	Social contribution (social well-being)
B1SPWBU1	A1SPIHOM	N	Y	Perceived inequality in home

## Sheet: Round 2
Relevant	VIF	Description	Problematic
A1SF1C	<5	Some wander aimlessly, but not me
A1SF1I	<5	Good managing daily responsibilities
A1SF1K	<5	Life process of learning/changing/growth
A1SF1M	<5	Others describe me as giving/share time
A1SF1X	<5	When really want something, find way
A1SF1Z	<5	Whether I get what want is in own hands
A1SG4	<5	Age would like to be	Y
A1SI8	<5	Number of years employed at least 6 months of year	Y
A1SK10A	<5	Give spouse/partner emotional support (hours/month)
A1SK10D	<5	Give children emotional support (hours/month)	Y
A1SK11C	<5	Receive emotional support in-laws (hours/month)	Y
A1SK12C	<5	Give unpaid assistance children (hours/month)	Y
A1SK17J	<5	People do not care about others problems
A1SK17N	<5	Believe people are kind
A1PD1	<10	Satisfied with life at present
A1PD9A	<10	Disappointed by achievement (agree/disagree level)	Y
A1SA7F	<10	Difficult to get good medical care	Y
A1SF1D	<10	Demands of everyday life often get me down
A1SF1F	<10	Maintaining close relationships difficult
A1SF1L	<10	Experience challenge how think important
A1SF1U	<10	Do just about anything I set my mind to
A1SF1Y	<10	Many things interfere with what I want do
A1SF3B	<10	Do what can to change for better
A1SF3P	<10	Know what I want out of life
A1SF3Q	<10	I live one day at a time
A1SF3T	<10	Helpful to set goals for near future
A1SF3W	<10	No use in thinking about past because nothing can be done
A1SF4A	<10	Outgoing describes you how well
A1SF4D	<10	Organized describes you how well
A1SF4Y	<10	Broad minded describes you how well
A1SF4Z	<10	Sympathetic describes you how well
A1SK17A	<10	World is too complex for me
A1SK17F	<10	Feel close to others in community
A1SK17G	<10	Daily activities not worthwhile for community
A1SK17M	<10	Society not improving for people like me
A1SK7I	<10	Serve on a jury if called
A1SK7Q	<10	Volunteer for social causes
A1SM13	<10	Rely on friends for help with problem
A1SM5	<10	Open up to family about worries

## Sheet: Round 2 — Extra
Variable	Description	Trait	Virtue	Min	Max	ValMin	ValMax	Question
A1PD1	Satisfied with life at present	Personality	Temperance	1	4	A lot	Not at all	And now a few questions about you. At present, how satisfied are you with your life?
A1PD2	Control over life in general at present	Planning	Temperance	1	4	A lot	Not at all	At present, how much control do you have over your life in general?
A1PD4	Outgoing describes you	Personality	Temperance	1	4	A lot	Not at all	[Interviewer: If necessary clarify: "By outgoing we mean sociable and interested in meeting people."] [Does this describe you a lot, somewhat, a little, or not at all?]
A1SA12G	Falling/staying sleep frequency (30 days)	Physical	Fortitude	1	6	Almost every day	Not at all	During the past 30 days, how often have you experienced the following? Trouble getting to sleep or staying asleep.
A1SA20	Summer moderate activity	Physical	Fortitude	1	6	Several times a week or more	Never	During the summer, how often do you engage in moderate physical activity (for example, bowling or using a vacuum cleaner)?
A1SA21	Winter moderate activity	Physical	Fortitude	1	6	Several times a week or more	Never	What about during the winter - how often do you engage in moderate physical activity?
A1SA7D	I work hard at trying to stay healthy	Physical	Fortitude	1	7	Agree strongly	Disagree strongly	I work hard at trying to stay healthy.
A1SF1C	Some wander aimlessly, but not me	Mindfulness	Prudence	1	7	Agree strongly	Disagree strongly	Some people wander aimlessly through life, but I am not one of them
A1SF1D	Demands of everyday life often get me down	Perseverance	Fortitude	1	7	Agree strongly	Disagree strongly	The demands of everyday life often get me down.
A1SF1DD	Happens to me in future depends on me	Mindfulness	Prudence	1	7	Agree strongly	Disagree strongly	What happens to me in the future mostly depends on me.
A1SF1F	Maintaining close relationships difficult	Friendship	Justice	1	7	Agree strongly	Disagree strongly	Maintaining close relationships has been difficult and frustrating for me.
A1SF1G	Live life day by day, don't think about future	Insight	Prudence	1	7	Agree strongly	Disagree strongly	I live life one day at a time and don't really think about the future.
A1SF1I	Good managing daily responsibilities	Insight	Temperance	1	7	Agree strongly	Disagree strongly	I am good at managing the responsibilities of daily life.
A1SF1K	Life process of learning/changing/growth	Perseverance	Prudence	1	7	Agree strongly	Disagree strongly	For me, life has been a continuous process of learning, changing, and growth.
A1SF1L	Experience challenge how think important	Personality	Fortitude	1	7	Agree strongly	Disagree strongly	I think it is important to have new experiences that challenge how I think about myself and the world.
A1SF1M	Others describe me as giving/share time	Community	Justice	1	7	Agree strongly	Disagree strongly	People would describe me as a giving person, willing to share my time with others.
A1SF1Q	Confidence in my opinions even if contrary	Perseverance	Temperance	1	7	Agree strongly	Disagree strongly	I have confidence in my own opinions, even if they are different from the way most other people think.
A1SF1U	Do just about anything I set my mind to	Perseverance	Prudence	1	7	Agree strongly	Disagree strongly	I can do just about anything I really set my mind to.
A1SF1X	When really want something, find way	Perseverance	Prudence	1	7	Agree strongly	Disagree strongly	When I really want to do something, I usually find a way to succeed at it.
A1SF1Y	Many things interfere with what I want do	Obstacles	Fortitude	1	7	Agree strongly	Disagree strongly	There are many things that interfere with what I want to do.
A1SF1Z	Whether I get what want is in own hands	Mindfulness	Prudence	1	7	Agree strongly	Disagree strongly	Whether or not I am able to get what I want is in my own hands.
A1SF3B	Do what can to change for better	Perseverance	Justice	1	4	A lot	Not at all	When faced with a bad situation, I do what I can to change it for the better.
A1SF3E	Learn meaningful from difficult situation	Perseverance	Prudence	1	4	A lot	Not at all	I find I usually learn something meaningful from a difficult situation.
A1SF3H	Find different way of looking at things	Perseverance	Prudence	1	4	A lot	Not at all	When I am faced with a bad situation, it helps to find a different way of looking at things.
A1SF3K	Rarely give up even when get tough	Perseverance	Fortitude	1	4	A lot	Not at all	I rarely give up on something I am doing, even when things get tough.
A1SF3O	Like to make plans for future	Insight	Prudence	1	4	A lot	Not at all	I like to make plans for the future.
A1SF3P	Know what I want out of life	Insight	Prudence	1	4	A lot	Not at all	I know what I want out of life.
A1SF3Q	I live one day at a time	Insight	Prudence	1	4	A lot	Not at all	I live one day at a time.
A1SF3T	Helpful to set goals for near future	Planning	Prudence	1	4	A lot	Not at all	I find it helpful to set goals for the near future.
A1SF3V	Past helps me figure out what do present	Insight	Prudence	1	4	A lot	Not at all	Making sense of my past helps me figure out what to do in the present.
A1SF3W	No use in thinking about past because nothing can be done	Insight	Prudence	1	4	A lot	Not at all	There is no use in thinking about the past because there is nothing you can do about it.
A1SF4A	Outgoing describes you how well	Personality	Temperance	1	4	A lot	Not at all	Please indicate how well each of the following describes you.
A1SF4D	Organized describes you how well	Planning	Temperance	1	4	A lot	Not at all	Please indicate how well each of the following describes you.
A1SF4G	Warm describes you how well	Personality	Justice	1	4	A lot	Not at all	Please indicate how well each of the following describes you.
A1SF4I	Responsible describes you how well	Personality	Justice	1	4	A lot	Not at all	Please indicate how well each of the following describes you: Responsible
A1SF4Q	Imaginative describes you how well	Personality	Prudence	1	4	A lot	Not at all	Please indicate how well each of the following describes you:
A1SF4S	Calm describes you how well	Personality	Temperance	1	4	A lot	Not at all	Please indicate how well each of the following describes you.
A1SF4T	Outspoken describes you how well	Personality	Temperance	1	4	A lot	Not at all	Please indicate how well each of the following describes you:
A1SF4V	Curious describes you how well	Personality	Prudence	1	4	A lot	Not at all	Please indicate how well each of the following describes you:
A1SF4Y	Broad minded describes you how well	Personality	Prudence	1	4	A lot	Not at all	Please indicate how well each of the following describes you.
A1SF4Z	Sympathetic describes you how well	Personality	Justice	1	4	A lot	Not at all	Please indicate how well each of the following describes you:
A1SG4	Age would like to be	Self-worth	Temperance	0	49	0	110	Now imagine you could be any age. What age would you like to be?
A1SK10A	Give spouse/partner emotional support (hours/month)	Relationship	Justice	0	744	None or does not apply	744	On average, about how many hours per month do you spend giving informal emotional support (such as comforting, listening to problems, or giving advice) to each of the following people? To your spouse or partner?
A1SK11A	Receive emotional support spouse/partner (hours/month)	Relationship	Justice	0	744	0	744	On average, about how many hours per month do you receive informal emotional support (such as getting comfort, having someone listen to you, or getting advice) from each of the following people? (If none, enter "0".) From your spouse or partner?
A1SK11F	Receive emotional support anyone else (hours/month)	Community	Justice	0	720	None or does not apply	720	On average, about how many hours per month do you receive informal emotional support (such as getting comfort, having someone listen to you, or getting advice) from each of the following people? (If none, enter "0".) From anyone else (such as neighbors or people at church)?
A1SK17A	World is too complex for me	Perseverance	Prudence	1	7	Agree strongly	Disagree strongly	The world is too complex for me.
A1SK17D	Have something valuable to give world	Self-worth	Justice	1	7	Agree strongly	Disagree strongly	I have something valuable to give to the world.
A1SK17F	Feel close to others in community	Community	Justice	1	7	Agree strongly	Disagree strongly	I feel close to other people in my community.
A1SK17G	Daily activities not worthwhile for community	Community	Justice	1	7	Agree strongly	Disagree strongly	My daily activities do not create anything worthwhile for my community.
A1SK17H	Cannot make sense of world	Personality	Prudence	1	7	Agree strongly	Disagree strongly	I cannot make sense of what's going on in the world.
A1SK17J	People do not care about others problems	Community	Justice	1	7	Agree strongly	Disagree strongly	People do not care about other people's problems.
A1SK17M	Society not improving for people like me	Perseverance	Justice	1	7	Agree strongly	Disagree strongly	Society isn't improving for people like me.
A1SK17N	Believe people are kind	Personality	Justice	1	7	Agree strongly	Disagree strongly	I believe that people are kind.
A1SK6F	Like to teach things to people	Community	Justice	1	4	A lot	Not at all	You like to teach things to people.
A1SK7F	Take friend into home	Relationship	Justice	0	10	None	Very great	How much obligation would you feel to take a friend into your home who could not afford to live alone?
A1SK7H	Give money to friend	Relationship	Justice	0	10	None	Very great	Here is a list of hypothetical situations. Please rate how much obligation you would feel if they happened to you, using a 0 to 10 scale where 0 means "no obligation at all" and 10 means "a very great obligation." If the situation does not apply to you, please think about how much obligation you would feel if you were in this situation. How much obligation would you feel to give money to a friend…
A1SK7I	Serve on a jury if called	Duty	Justice	0	10	None	Very great	How much obligation would you feel to serve on a jury if called?
A1SK7Q	Volunteer for social causes	Duty	Justice	0	10	None	Very great	How much obligation would you feel to volunteer time or money to social causes you support?
A1SK8D	Volunteer other organization/causes (hours/month)	Community	Justice	0	400	0	400	On average, about how many hours per month do you spend doing formal volunteer work of any of the following types? (If none, enter "0".) Volunteer work for any other organization, cause or charity
A1SL5D	Proud of my home	Community	Temperance	1	4	A lot	Not at all	The next few questions are about your home and the neighborhood you live in. Please indicate how much each of the following statements describes your situation. I'm proud of my home.
A1SM13	Rely on friends for help with problem	Relationship	Justice	1	4	A lot	Not at all	How much can you rely on them for help if you have a serious problem?
A1SM4	Rely on family for help with problem	Relationship	Justice	1	4	A lot	Not at all	How much can you rely on them for help if you have a serious problem?
A1SM5	Open up to family about worries	Relationship	Justice	1	4	A lot	Not at all	How much can you open up to them if you need to talk about your worries?
A1SQ1	Rate sexual aspect of life currently	Relationship	Temperance	0	10	Worst	Best	Using a scale from 0 to 10 where 0 means "the worst possible situation" and 10 means "the best possible situation," how would you rate the sexual aspect of your life these days?
