# Supplementary material for: Optimizing future well-being with artificial intelligence: self-organizing maps (SOMs) for the identification of islands of emotional stability
Source: publisher site journal article supplement (doi:10.18632/aging.204061), 2022-06-20
Supplement: Supplementary file [file aging-v14i12-204061-supplementary-material-SD2.pdf]

## SUPPLEMENTARY TABLES

**Supplementary Table 1. Predictor accuracy metrics for all target variables.**

| Target variable     | Variable description              | MAPE, %  |       | MAE, units |       | Pearson's r |      |
|---------------------|-----------------------------------|----------|-------|------------|-------|-------------|------|
|                     |                                   | Training | Test  | Training   | Test  | Training    | Test |
| A1PAGE_M2(adjusted) |                                   | 9.50     | 9.79  | 4.29       | 4.30  | 0.91        | 0.92 |
| A1PAGE_M2           | Current age                       | 20.57    | 21.39 | 8.97       | 9.06  | 0.46        | 0.47 |
| A1PAGE_M2(baseline) |                                   | 23.79    | 23.31 | 10.31      | 10.32 | 0.00        | 0.00 |
| B1SPWBA1            | Autonomy in 10 years              | 15.84    | 15.81 | 2.36       | 2.36  | 0.35        | 0.34 |
| B1SPWBE1            | Environmental mastery in 10 years | 14.38    | 18.51 | 2.10       | 2.28  | 0.51        | 0.48 |
| B1SPWBG1            | Personal growth in 10 years       | 13.91    | 15.97 | 2.08       | 2.25  | 0.52        | 0.53 |
| B1SPWBR1            | Positive relations in 10 years    | 16.52    | 18.47 | 2.31       | 2.46  | 0.58        | 0.61 |
| B1SPWBS1            | Self-acceptance in 10 years       | 18.42    | 22.53 | 2.39       | 2.62  | 0.54        | 0.53 |
| B1SPWBU1            | Purpose in life in 10 years       | 17.25    | 19.27 | 2.42       | 2.59  | 0.43        | 0.39 |

Training metrics were obtained in five-fold cross-validation. MAE is measured in years for age and in points for well-being. The baseline model for age prediction was the median age assignment.

**Supplementary Table 2. Relative importance analysis shows that future predicted well-being is more closely associated with actual future well-being than current well-being, age, or sex.**

| MIDUS2 target variable | Target description    | Is male | Chronological age | Predicted MIDUS2 variable | MIDUS1 actual well-being variables |         |         |         |         |         |
|------------------------|-----------------------|---------|-------------------|---------------------------|------------------------------------|---------|---------|---------|---------|---------|
|                        |                       |         |                   |                           | A1SPWBR                            | A1SPWBS | A1SPWBA | A1SPWBG | A1SPWBE | A1SPWBU |
| B1SPWBR1               | Close relations       | -0.26 * | 0.02              | 0.43 *                    | 0.23 *                             | 0.08    | -0.02   | 0.02    | 0.01    | 0.05    |
| B1SPWBS1               | Self-acceptance       | 0.00    | 0.01              | 0.52 *                    | 0.02                               | 0.38 *  | 0.00    | 0.00    | -0.01   | -0.01   |
| B1SPWBA1               | Autonomy              | 0.15 *  | 0.01              | 0.47 *                    | 0.01                               | 0.00    | 0.35 *  | 0.00    | 0.00    | 0.01    |
| B1SPWBG1               | Personal growth       | -0.32 * | -0.01             | 0.55 *                    | 0.01                               | 0.07    | 0.00    | 0.19 *  | -0.02   | 0.04    |
| B1SPWBE1               | Environmental mastery | 0.25 *  | 0.02              | 0.63 *                    | 0.01                               | 0.09    | 0.00    | 0.01    | 0.10 *  | 0.00    |
| B1SPWBU1               | Purpose in life       | 0.00    | -0.03             | 0.39 *                    | 0.00                               | 0.00    | 0.01    | 0.09    | 0.02    | 0.28 *  |

EN linear regressions were trained to approximate each MIDUS2 well-being variable using sex (binary "Is male"), age, predicted counterpart of the MIDUS2 variable, and all six MIDUS1 well-being variables. The largest coefficients in all cases belonged to model predictions, attesting to them being more important determinants of future well-being than current well-being. Asterisks mark the EN coefficients larger than 0.1 in absolute terms. EN is elastic net (see Methods).

**Supplementary Table 3. Correlation between mean well-being scores and depression odds for people mapped to the same SOM cells.**

| <b>Time point</b> | <b>Well-being parameter</b> | <b>Pearson's r</b> |
|-------------------|-----------------------------|--------------------|
| MIDUS1            | Close relationships         | -0.24*             |
|                   | Self-acceptance             | -0.36*             |
|                   | Autonomy                    | -0.24*             |
|                   | Personal growth             | -0.16*             |
|                   | Environmental mastery       | -0.33              |
| MIDUS2            | Purpose in life             | -0.15*             |
|                   | Close relationships         | -0.21*             |
|                   | Self-acceptance             | -0.25*             |
|                   | Autonomy                    | -0.12*             |
|                   | Personal growth             | -0.11              |
|                   | Environmental mastery       | -0.25*             |
|                   | Purpose in life             | -0.06              |

“\*” marks the coefficients with  $p < 0.01$ .
